# Supplementary material for: Efficiency of ITS Sequences for DNA Barcoding in Passiflora (Passifloraceae)
Source: PubMed Central journal article supplement (PMC4425017; doi:10.3390/ijms16047289), 2015-04-01
Supplement: ijms-16-07289-s001.pdf [file ijms-16-07289-s001.pdf]

# Supplementary Information

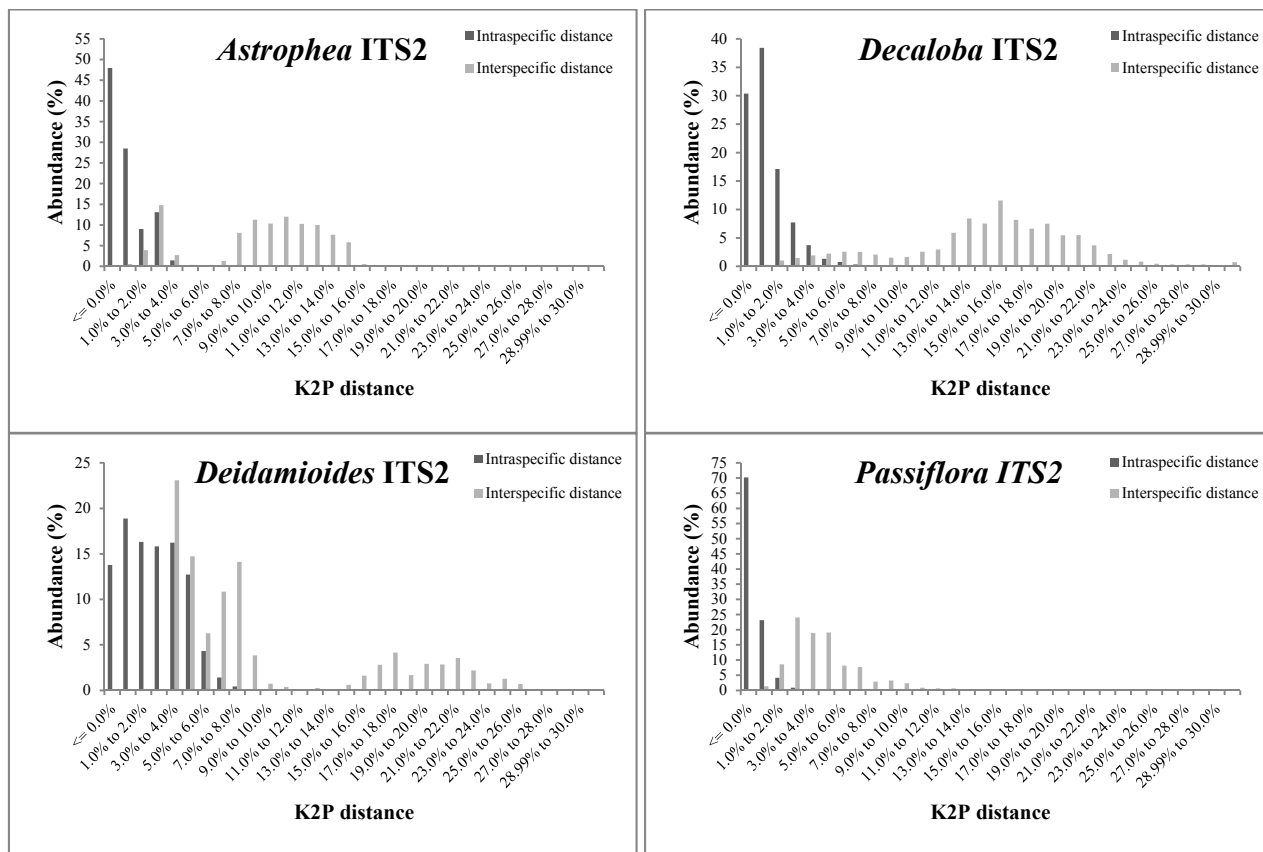

**Figure S1.** Relative abundance of intra- and inter-specific Kimura-2-Parameter pairwise distance considering the ITS2 dataset in subgenera *Astrophea*, *Decaloba*, *Deidamioides*, and *Passiflora*.

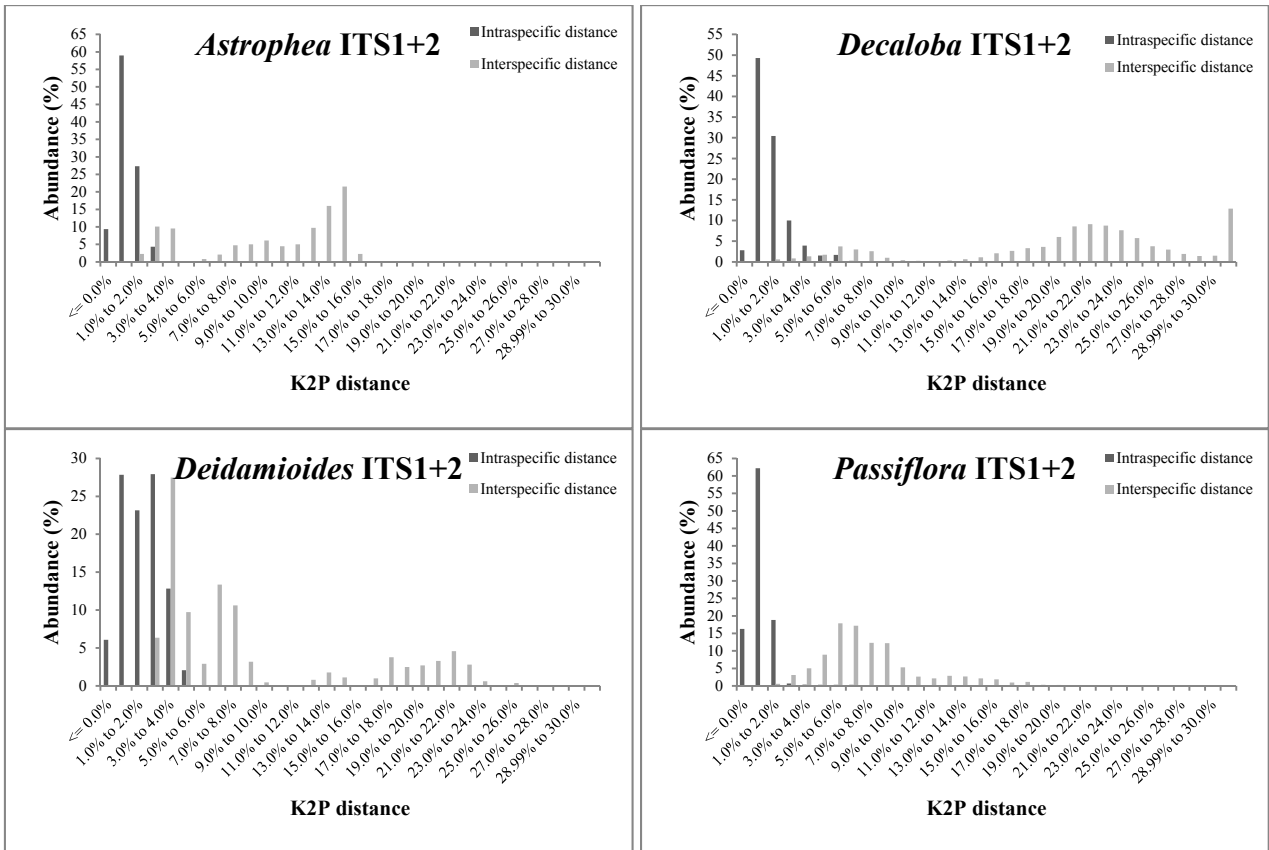

**Figure S2.** Relative abundance of intra- and inter-specific Kimura-2-Parameter pairwise distance considering the ITS1+2 dataset in subgenera *Astrophea*, *Decaloba*, *Deidamioides*, and *Passiflora*.

**Table S1.** Results for “best match” (BM) and “best close match” (BCM) analyses of TaxonDNA software for Plastid Marker *matK*, *rbcL*, *trnL-psbA*, and *trnL* intron (UAA).

| Barcode Region           | N Individuals            | BM, N (%)                                                   |       |       | BCM, N (%) |       |       | No Match | Threshold, % |
|--------------------------|--------------------------|-------------------------------------------------------------|-------|-------|------------|-------|-------|----------|--------------|
|                          |                          | C                                                           | A     | I     | C          | A     | I     |          |              |
| <i>matK</i>              | 47 (22 sp.)              | 38.29                                                       | 42.55 | 19.14 | 38.29      | 42.55 | 19.14 | 0        | 14.49        |
| <i>rbcL</i>              | 191 (122 sp.)            | 36.64                                                       | 23.56 | 39.79 | 36.64      | 23.56 | 37.17 | 2.61     | 1.49         |
| <i>trnH-psbA</i>         | 63 (30 sp.)              | 44.44                                                       | 17.46 | 38.09 | 42.85      | 17.46 | 19.04 | 20.63    | 2.20         |
| <i>trnL</i> intron (UAA) | 346 (185 sp.)            | 18.78                                                       | 49.13 | 32.08 | 11.84      | 43.35 | 2.60  | 42.19    | 0.0          |
| <i>rpoB</i>              | Four sequences available | Analysis not performed due to low availability of sequences |       |       |            |       |       |          |              |
| <i>rpoC1</i>             | Six sequences available  |                                                             |       |       |            |       |       |          |              |
| <i>atpF-atpH</i>         | Two sequences available  |                                                             |       |       |            |       |       |          |              |
| <i>psbK-psbI</i>         | No sequences available   |                                                             |       |       |            |       |       |          |              |

BM, best match; BCM, best close match; C, correct; A, ambiguous; I, incorrect.

**Table S2.** GenBank Access numbers for ITS sequences per *Passiflora* subgenera.

| <i>Astrophea</i> ITS1   |                                | <i>Astrophea</i> ITS2   |                                |
|-------------------------|--------------------------------|-------------------------|--------------------------------|
| Species                 | GenBank Access                 | Species                 | GenBank Access                 |
| <i>P. amoena</i>        | KP769869 <sup>a</sup>          | <i>P. amoena</i>        | KP769917 <sup>a</sup>          |
| <i>P. arborea</i>       | JX470767 <sup>b</sup>          | <i>P. arborea</i>       | JX470767 <sup>b</sup>          |
| <i>P. candida</i>       | DQ521279 <sup>c</sup>          | <i>P. candida</i>       | DQ521279 <sup>c</sup>          |
| <i>P. ceratocarpa</i>   | KP769870 <sup>a</sup>          | <i>P. ceratocarpa</i>   | KP769918 <sup>a</sup>          |
| <i>P. citrifolia</i>    | AY210939 <sup>d</sup>          | <i>P. citrifolia</i>    | AY210920 <sup>d</sup>          |
|                         | AY632707 <sup>e</sup>          |                         | AY632707 <sup>e</sup>          |
| <i>P. haematostigma</i> | EU258395—EU258408 <sup>f</sup> | <i>P. haematostigma</i> | EU258395—EU258408 <sup>f</sup> |
|                         | EU907230—EU907234 <sup>g</sup> |                         | EU907230—EU907234 <sup>g</sup> |
|                         | AY032835 <sup>d</sup>          |                         | AY032794 <sup>d</sup>          |
| <i>P. jussieu</i>       | JX470768 <sup>b</sup>          | <i>P. jussieu</i>       | JX470768 <sup>b</sup>          |
| <i>P. kawensis</i>      | KP769871 <sup>a</sup>          | <i>P. kawensis</i>      | KP769919 <sup>a</sup>          |
| <i>P. lindeniana</i>    | KP769872 <sup>a</sup>          | <i>P. lindeniana</i>    | KP769920 <sup>a</sup>          |
| <i>P. macrophylla</i>   | EU907225—EU907230 <sup>g</sup> | <i>P. macrophylla</i>   | EU907225—EU907230 <sup>g</sup> |
|                         | AY210944 <sup>d</sup>          |                         | AY210925 <sup>d</sup>          |
|                         | DQ458062 <sup>h</sup>          |                         | DQ458062 <sup>h</sup>          |
| <i>P. mansoi</i>        | AY102361 <sup>d</sup>          | <i>P. mansoi</i>        | AY102381 <sup>d</sup>          |
| <i>P. pittieri</i>      | DQ995476 <sup>h</sup>          | <i>P. pittieri</i>      | DQ995476 <sup>h</sup>          |
| <i>P. pyrrhantha</i>    | JX470771 <sup>b</sup>          | <i>P. pyrrhantha</i>    | JX470771 <sup>b</sup>          |
| <i>P. rhamnifolia</i>   | KP769873-KP769884 <sup>a</sup> | <i>P. rhamnifolia</i>   | KP769921-KP769932 <sup>a</sup> |
| <i>P. sphaerocarpa</i>  | JX470769 <sup>b</sup>          | <i>P. sphaerocarpa</i>  | JX470769 <sup>b</sup>          |
| <i>P. tina</i>          | JX470770 <sup>b</sup>          | <i>P. tina</i>          | JX470770 <sup>b</sup>          |

<sup>a</sup> Sequences from Giudicelli *et al.* (in prep); <sup>b</sup> Krosnick, S.E.; Porter-Utley, K.E.; MacDougal, J.M.; Jørgensen, P.M.; McDade, L.A. New insights into the evolution of *Passiflora* subgenus *Decaloba* (Passifloraceae): Phylogenetic relationships and morphological synapomorphies. *Syst. Bot.* **2013**, *38*, 692–713; <sup>c</sup> Hearn, D.J. *Adenia* (Passifloraceae) and its adaptative radiation: Phylogeny and growth form diversification. *Syst. Bot.* **2006**, *31*, 805–821; <sup>d</sup> Muschner, V.C.; Lorenz, A.P.; Cervi, A.C.; Bonatto, S.L.; Souza-Chies, T.T.; Salzano, F.M.; Freitas, L.B. A first molecular phylogenetic analysis of *Passiflora* (Passifloraceae). *Am. J. Bot.* **2003**, *90*, 1229–1238; <sup>e</sup> Krosnick, S.E.; Freudenstein, J.V. Monophyly and floral character homology of old world *Passiflora* (Subgenus *Decaloba*: Supersection *Disemma*). *Syst. Bot.* **2005**, *30*, 139–152; <sup>f</sup> Mäder, G.; Zamberlan, P.M.; Fagundes, N.J.R.; Magnus, T.; Salzano, F.M.; Bonatto, S.L.; Freitas, L.B. The use and limits of ITS data in the analysis of intraspecific variation in *Passiflora* L. (Passifloraceae). *Genet. Mol. Biol.* **2010**, *33*, 99–108; <sup>g</sup> Mäder, G.; Magnus, T.; Lorenz-Lemke, A.P.; *et al.* ITS subgenera and intraspecific variability in Brazilian *Passiflora*: Understandin molecular evolution. Unpublished; <sup>h</sup> Krosnick, S.E.; Ford, A.; Freudenstein, J.V. Resolving the phylogenetic position of *Hollrungia* and *Tetrapathaea*: The end of two monotypic genera in Passifloraceae. Unpublished.

Table S2. Cont.

| <i>Decaloba</i> ITS1      |                                | <i>Decaloba</i> ITS2      |                                |
|---------------------------|--------------------------------|---------------------------|--------------------------------|
| Species                   | GenBank Access                 | Species                   | GenBank Access                 |
| <i>P. adenopoda</i>       | AY632702 <sup>a</sup>          | <i>P. adenopoda</i>       | AY632702 <sup>a</sup>          |
| <i>P. allantophylla</i>   | DQ458069 <sup>b</sup>          | <i>P. allantophylla</i>   | DQ458069 <sup>b</sup>          |
| <i>P. altebilobata</i>    | DQ458078 <sup>b</sup>          | <i>P. altebilobata</i>    | DQ458078 <sup>b</sup>          |
| <i>P. anadenia</i>        | JX470833 <sup>c</sup>          | <i>P. anadenia</i>        | JX470833 <sup>c</sup>          |
| <i>P. apetala</i>         | JX470822 <sup>c</sup>          | <i>P. apetala</i>         | JX470822 <sup>c</sup>          |
| <i>P. apoda</i>           | JX470779 <sup>c</sup>          | <i>P. apoda</i>           | JX470779 <sup>c</sup>          |
| <i>P. aurantia</i>        | DQ521280 <sup>d</sup>          | <i>P. aurantia</i>        | DQ521280 <sup>d</sup>          |
|                           | AY632704 <sup>a</sup>          |                           | AY632704 <sup>a</sup>          |
| <i>P. auriculata</i>      | AF454804 <sup>e</sup>          | <i>P. auriculata</i>      | AF454804 <sup>e</sup>          |
|                           | DQ284532 <sup>f</sup>          |                           | DQ284532 <sup>f</sup>          |
| <i>P. berteroana</i>      | JX470780 <sup>c</sup>          | <i>P. berteroana</i>      | JX470780 <sup>c</sup>          |
| <i>P. bicornis</i>        | JX470836 <sup>c</sup>          | <i>P. bicornis</i>        | JX470836 <sup>c</sup>          |
| <i>P. bicrura</i>         | JX470834 <sup>c</sup>          | <i>P. bicrura</i>         | JX470834 <sup>c</sup>          |
| <i>P. biflora</i>         | DQ521281 <sup>d</sup>          | <i>P. biflora</i>         | DQ521281 <sup>d</sup>          |
|                           | AF454805 <sup>e</sup>          |                           | AF454805 <sup>e</sup>          |
|                           | AY632705 <sup>a</sup>          |                           | AY632705 <sup>a</sup>          |
|                           | JX470837 <sup>c</sup>          |                           | JX470837 <sup>c</sup>          |
| <i>P. boendery</i>        | JX470823 <sup>c</sup>          | <i>P. boendery</i>        | JX470823 <sup>c</sup>          |
| <i>P. bryonioides</i>     | JX470796 <sup>c</sup>          | <i>P. bryonioides</i>     | JX470796 <sup>c</sup>          |
| <i>P. calcicola</i>       | JX470813 <sup>c</sup>          | <i>P. calcicola</i>       | JX470813 <sup>c</sup>          |
| <i>P. capsularis</i>      | EU258327—EU258351 <sup>g</sup> | <i>P. capsularis</i>      | EU258327—EU258351 <sup>g</sup> |
|                           | EU907235—EU907250 <sup>h</sup> |                           | EU907235—EU907250 <sup>h</sup> |
|                           | AY032837 <sup>i</sup>          |                           | AY032796 <sup>i</sup>          |
|                           | JX470806 <sup>c</sup>          |                           | JX470806 <sup>c</sup>          |
| <i>P. chelidonea</i>      | JX470838 <sup>c</sup>          | <i>P. chelidonea</i>      | JX470838 <sup>c</sup>          |
| <i>P. chrysosepala</i>    | JX470839 <sup>c</sup>          | <i>P. chrysosepala</i>    | JX470839 <sup>c</sup>          |
| <i>P. cinnabarina</i>     | AY632706 <sup>a</sup>          | <i>P. cinnabarina</i>     | AY632706 <sup>a</sup>          |
| <i>P. citrina</i>         | DQ458083 <sup>b</sup>          | <i>P. citrina</i>         | DQ458083 <sup>b</sup>          |
|                           | JX463165 <sup>c</sup>          |                           | JX463165 <sup>c</sup>          |
| <i>P. cobanensis</i>      | JX470807 <sup>c</sup>          | <i>P. cobanensis</i>      | JX470807 <sup>c</sup>          |
| <i>P. cochinchinensis</i> | DQ458080 <sup>b</sup>          | <i>P. cochinchinensis</i> | DQ458080 <sup>b</sup>          |
|                           | DQ087422                       |                           | DQ087422                       |
|                           | AY632714 <sup>a</sup>          |                           | AY632714 <sup>a</sup>          |
| <i>P. colimensis</i>      | JX470797 <sup>c</sup>          | <i>P. colimensis</i>      | JX470797 <sup>c</sup>          |
| <i>P. complanata</i>      | JX470827 <sup>c</sup>          | <i>P. complanata</i>      | JX470827 <sup>c</sup>          |
| <i>P. coriacea</i>        | AF454807 <sup>e</sup>          | <i>P. coriacea</i>        | AF454807 <sup>e</sup>          |
|                           | AY210940 <sup>i</sup>          |                           | AY210921 <sup>i</sup>          |
|                           | DQ238786 <sup>f</sup>          |                           | DQ238786 <sup>f</sup>          |
|                           | JX463147 <sup>c</sup>          |                           | JX463147 <sup>c</sup>          |
|                           | JX470790 <sup>c</sup>          |                           | JX470790 <sup>c</sup>          |
| <i>P. cubensis</i>        | JX470814 <sup>c</sup>          | <i>P. cubensis</i>        | JX470814 <sup>c</sup>          |
| <i>P. cuneata</i>         | JX470840 <sup>c</sup>          | <i>P. cuneata</i>         | JX470840 <sup>c</sup>          |
| <i>P. cupiformis</i>      | AY632708 <sup>a</sup>          | <i>P. cupiformis</i>      | AY632708 <sup>a</sup>          |

Table S2. Cont.

| <i>Decaloba</i> ITS1     |                                                         | <i>Decaloba</i> ITS2     |                                                         |
|--------------------------|---------------------------------------------------------|--------------------------|---------------------------------------------------------|
| Species                  | GenBank Access                                          | Species                  | GenBank Access                                          |
| <i>P. cupraea</i>        | AY210941 <sup>i</sup><br>JX470815 <sup>c</sup>          | <i>P. cupraea</i>        | AY210922 <sup>i</sup><br>JX470815 <sup>c</sup>          |
| <i>P. dolichocarpa</i>   | JX470798 <sup>c</sup>                                   | <i>P. dolichocarpa</i>   | JX470798 <sup>c</sup>                                   |
| <i>P. eberhardtii</i>    | DQ458073 <sup>b</sup><br>JX470778 <sup>c</sup>          | <i>P. eberhardtii</i>    | DQ458073 <sup>b</sup><br>JX470778 <sup>c</sup>          |
| <i>P. ekmanii</i>        | JX470835 <sup>c</sup>                                   | <i>P. ekmanii</i>        | JX470835 <sup>c</sup>                                   |
| <i>P. escobariana</i>    | JX470808 <sup>c</sup>                                   | <i>P. escobariana</i>    | JX470808 <sup>c</sup>                                   |
| <i>P. exsudans</i>       | JX470799 <sup>c</sup>                                   | <i>P. exsudans</i>       | JX470799 <sup>c</sup>                                   |
| <i>P. geminiflora</i>    | DQ458075—DQ458076 <sup>b</sup>                          | <i>P. geminiflora</i>    | DQ458075—DQ458076 <sup>b</sup>                          |
| <i>P. gilbertiana</i>    | JX470824 <sup>c</sup>                                   | <i>P. gilbertiana</i>    | JX470824 <sup>c</sup>                                   |
| <i>P. gracilis</i>       | JX470800 <sup>c</sup>                                   | <i>P. gracilis</i>       | JX470800 <sup>c</sup>                                   |
| <i>P. guatemalensis</i>  | DQ087419 <sup>f</sup>                                   | <i>P. guatemalensis</i>  | DQ087419 <sup>f</sup>                                   |
| <i>P. hahnii</i>         | JX470777 <sup>c</sup>                                   | <i>P. hahnii</i>         | JX470777 <sup>c</sup>                                   |
| <i>P. helleri</i>        | AY210942 <sup>i</sup><br>DQ458082 <sup>b</sup>          | <i>P. helleri</i>        | AY210923 <sup>i</sup><br>DQ458082 <sup>b</sup>          |
| <i>P. henryi</i>         | AY632710 <sup>a</sup>                                   | <i>P. henryi</i>         | AY632710 <sup>a</sup>                                   |
| <i>P. herbertiana</i>    | AY632711 <sup>a</sup>                                   | <i>P. herbertiana</i>    | AY632711 <sup>a</sup>                                   |
| <i>P. hirtiflora</i>     | JX470841 <sup>c</sup>                                   | <i>P. hirtiflora</i>     | JX470841 <sup>c</sup>                                   |
| <i>P. hollrungii</i>     | DQ458081 <sup>b</sup>                                   | <i>P. hollrungii</i>     | DQ458081 <sup>b</sup>                                   |
| <i>P. holosericea</i>    | DQ087417 <sup>f</sup><br>JX470781 <sup>c</sup>          | <i>P. holosericea</i>    | DQ087417 <sup>f</sup><br>JX470781 <sup>c</sup>          |
| <i>P. ichthyura</i>      | JX470842 <sup>c</sup>                                   | <i>P. ichthyura</i>      | JX470842 <sup>c</sup>                                   |
| <i>P. ilamo</i>          | JX470825 <sup>c</sup>                                   | <i>P. ilamo</i>          | JX470825 <sup>c</sup>                                   |
| <i>P. inca</i>           | JX463163 <sup>c</sup>                                   | <i>P. inca</i>           | JX463163 <sup>c</sup>                                   |
| <i>P. indecora</i>       | JX470843 <sup>c</sup>                                   | <i>P. indecora</i>       | JX470843 <sup>c</sup>                                   |
| <i>P. intricata</i>      | JX470844 <sup>c</sup>                                   | <i>P. intricata</i>      | JX470844 <sup>c</sup>                                   |
| <i>P. jianfengensis</i>  | DQ458077 <sup>b</sup>                                   | <i>P. jianfengensis</i>  | DQ458077 <sup>b</sup>                                   |
| <i>P. jugorum</i>        | AY632712 <sup>a</sup>                                   | <i>P. jugorum</i>        | AY632712 <sup>a</sup>                                   |
| <i>P. juliana</i>        | JX463152—JX463154 <sup>c</sup><br>JX470791 <sup>c</sup> | <i>P. juliana</i>        | JX463152—JX463154 <sup>c</sup><br>JX470791 <sup>c</sup> |
| <i>P. karwinskii</i>     | JX470801 <sup>c</sup>                                   | <i>P. karwinskii</i>     | JX470801 <sup>c</sup>                                   |
| <i>P. kwangtungensis</i> | KF207865 <sup>j</sup>                                   | <i>P. kwangtungensis</i> | KF207865 <sup>j</sup>                                   |
| <i>P. lancearia</i>      | JX470845 <sup>c</sup>                                   | <i>P. lancearia</i>      | JX470845 <sup>c</sup>                                   |
| <i>P. lancetillensis</i> | AY210943 <sup>i</sup>                                   | <i>P. lancetillensis</i> | AY210924 <sup>i</sup>                                   |
| <i>P. lancifolia</i>     | JX463158 <sup>c</sup><br>JX470792 <sup>c</sup>          | <i>P. lancifolia</i>     | JX463158 <sup>c</sup><br>JX470792 <sup>c</sup>          |
| <i>P. leptoclada</i>     | JX470846 <sup>c</sup>                                   | <i>P. leptoclada</i>     | JX470846 <sup>c</sup>                                   |
| <i>P. leschenaultii</i>  | DQ458079 <sup>b</sup>                                   | <i>P. leschenaultii</i>  | DQ458079 <sup>b</sup>                                   |
| <i>P. litoralis</i>      | JX463107 <sup>c</sup><br>JX463109 <sup>c</sup>          | <i>P. litoralis</i>      | JX463107 <sup>c</sup><br>JX463109 <sup>c</sup>          |
|                          | JX463112—JX463118 <sup>c</sup>                          |                          | JX463112—JX463118 <sup>c</sup>                          |
|                          | JX463123—JX463126 <sup>c</sup>                          |                          | JX463123—JX463126 <sup>c</sup>                          |
|                          | JX463133—JX463134 <sup>c</sup>                          |                          | JX463133—JX463134 <sup>c</sup>                          |

Table S2. Cont.

| <i>Decaloba</i> ITS1                         |                                                                                           | <i>Decaloba</i> ITS2                         |                                                                                           |
|----------------------------------------------|-------------------------------------------------------------------------------------------|----------------------------------------------|-------------------------------------------------------------------------------------------|
| Species                                      | GenBank Access                                                                            | Species                                      | GenBank Access                                                                            |
| <i>P. lobata</i>                             | AF454808 <sup>e</sup><br>JX463164 <sup>c</sup><br>JX470802 <sup>c</sup>                   | <i>P. lobata</i>                             | AF454808 <sup>e</sup><br>JX463164 <sup>c</sup><br>JX470802 <sup>c</sup>                   |
| <i>P. lobbii</i>                             | JX463162 <sup>c</sup>                                                                     | <i>P. lobbii</i>                             | JX463162 <sup>c</sup>                                                                     |
| <i>P. lobbii</i> subsp. <i>ayacuchoensis</i> | JX470782 <sup>c</sup>                                                                     | <i>P. lobbii</i> subsp. <i>ayacuchoensis</i> | JX470782 <sup>c</sup>                                                                     |
| <i>P. lutea</i>                              | DQ006022 <sup>k</sup>                                                                     | <i>P. lutea</i>                              | DQ006022 <sup>k</sup>                                                                     |
| <i>P. maestrensis</i>                        | JX470816 <sup>c</sup>                                                                     | <i>P. maestrensis</i>                        | JX470816 <sup>c</sup>                                                                     |
| <i>P. mcvaughiana</i>                        | JX463148—JX463149 <sup>c</sup>                                                            | <i>P. mcvaughiana</i>                        | JX463148—JX463149 <sup>c</sup>                                                            |
| <i>P. membranacea</i>                        | AY632701 <sup>a</sup>                                                                     | <i>P. membranacea</i>                        | AY632701 <sup>a</sup>                                                                     |
| <i>P. mexicana</i>                           | AY632713 <sup>a</sup>                                                                     | <i>P. mexicana</i>                           | AY632713 <sup>a</sup>                                                                     |
| <i>P. micropetala</i>                        | KP769908 <sup>l</sup><br>JX470847 <sup>c</sup>                                            | <i>P. micropetala</i>                        | KP769956 <sup>l</sup><br>JX470847 <sup>c</sup>                                            |
| <i>P. microstipula</i>                       | DQ458066 <sup>m</sup>                                                                     | <i>P. microstipula</i>                       | DQ458066 <sup>m</sup>                                                                     |
| <i>P. misera</i>                             | EU258409—EU258413 <sup>g</sup><br>AY032838 <sup>i</sup><br>JX470848 <sup>c</sup>          | <i>P. misera</i>                             | EU258409—EU258413 <sup>g</sup><br>AY032797 <sup>i</sup><br>JX470848 <sup>c</sup>          |
| <i>P. moluccana</i> var. <i>glaberrima</i>   | DQ284536 <sup>f</sup>                                                                     | <i>P. moluccana</i> var. <i>glaberrima</i>   | DQ284536 <sup>f</sup>                                                                     |
| <i>P. monadelphica</i>                       | DQ087418 <sup>f</sup><br>JX470783 <sup>c</sup>                                            | <i>P. monadelphica</i>                       | DQ087418 <sup>f</sup><br>JX470783 <sup>c</sup>                                            |
| <i>P. morifolia</i>                          | EU258323—EU258324 <sup>g</sup><br>AY032842 <sup>i</sup><br>DQ284533 <sup>f</sup>          | <i>P. morifolia</i>                          | EU258323—EU258324 <sup>g</sup><br>AY032801 <sup>i</sup><br>DQ284533 <sup>f</sup>          |
| <i>P. multiflora</i>                         | AY210945 <sup>i</sup><br>AY632715                                                         | <i>P. multiflora</i>                         | AY210926 <sup>i</sup><br>AY632715                                                         |
| <i>P. munchiquensis</i>                      | JX470784 <sup>c</sup>                                                                     | <i>P. munchiquensis</i>                      | JX470784 <sup>c</sup>                                                                     |
| <i>P. murucuja</i>                           | AY648559 <sup>n</sup><br>JX470817 <sup>c</sup>                                            | <i>P. murucuja</i>                           | AY648559 <sup>n</sup><br>JX470817 <sup>c</sup>                                            |
| <i>P. oblongata</i>                          | JX470818 <sup>c</sup>                                                                     | <i>P. oblongata</i>                          | JX470818 <sup>c</sup>                                                                     |
| <i>P. obtusifolia</i>                        | JX463150—JX463151 <sup>c</sup><br>JX470793 <sup>c</sup>                                   | <i>P. obtusifolia</i>                        | JX463150—JX463151 <sup>c</sup><br>JX470793 <sup>c</sup>                                   |
| <i>P. occidentalis</i>                       | JX470849 <sup>c</sup>                                                                     | <i>P. occidentalis</i>                       | JX470849 <sup>c</sup>                                                                     |
| <i>P. orbiculata</i>                         | JX470819 <sup>c</sup>                                                                     | <i>P. orbiculata</i>                         | JX470819 <sup>c</sup>                                                                     |
| <i>P. organensis</i>                         | EU258414—EU258426 <sup>g</sup><br>AY032839 <sup>i</sup>                                   | <i>P. organensis</i>                         | EU258414—EU258426 <sup>g</sup><br>AY032798 <sup>i</sup>                                   |
| <i>P. ornithoura</i>                         | JX470826 <sup>c</sup>                                                                     | <i>P. ornithoura</i>                         | JX470826 <sup>c</sup>                                                                     |
| <i>P. pallida</i>                            | DQ458084 <sup>b</sup><br>JX463127—JX463132 <sup>c</sup><br>JX463135—JX463142 <sup>c</sup> | <i>P. pallida</i>                            | DQ458084 <sup>b</sup><br>JX463127—JX463132 <sup>c</sup><br>JX463135—JX463142 <sup>c</sup> |
| <i>P. papilio</i>                            | DQ458074 <sup>b</sup>                                                                     | <i>P. papilio</i>                            | DQ458074 <sup>b</sup>                                                                     |
| <i>P. pardifolia</i>                         | JX470850 <sup>c</sup>                                                                     | <i>P. pardifolia</i>                         | JX470850 <sup>c</sup>                                                                     |
| <i>P. pavonis</i>                            | JX470831 <sup>c</sup>                                                                     | <i>P. pavonis</i>                            | JX470831 <sup>c</sup>                                                                     |

Table S2. Cont.

| <i>Decaloba</i> ITS1                    |                                | <i>Decaloba</i> ITS2                    |                                |
|-----------------------------------------|--------------------------------|-----------------------------------------|--------------------------------|
| Species                                 | GenBank Access                 | Species                                 | GenBank Access                 |
| <i>P. pedicellaris</i>                  | JX470776 <sup>c</sup>          | <i>P. pedicellaris</i>                  | JX470776 <sup>c</sup>          |
| <i>P. pendens</i>                       | JX470803 <sup>c</sup>          | <i>P. pendens</i>                       | JX470803 <sup>c</sup>          |
| <i>P. penduliflora</i>                  | KP769909 <sup>l</sup>          | <i>P. penduliflora</i>                  | KP769957 <sup>l</sup>          |
|                                         | JX463166 <sup>c</sup>          |                                         | JX463166 <sup>c</sup>          |
|                                         | JX470820 <sup>c</sup>          |                                         | JX470820 <sup>c</sup>          |
| <i>P. perakensis</i>                    | DQ087423 <sup>f</sup>          | <i>P. perakensis</i>                    | DQ087423 <sup>f</sup>          |
| <i>P. perfoliata</i>                    | JX463167 <sup>c</sup>          | <i>P. perfoliata</i>                    | JX463167 <sup>c</sup>          |
|                                         | JX470821 <sup>c</sup>          |                                         | JX470821 <sup>c</sup>          |
| <i>P. pilosa</i>                        | JX470804 <sup>c</sup>          | <i>P. pilosa</i>                        | JX470804 <sup>c</sup>          |
| <i>P. podlechii</i>                     | KP769910 <sup>l</sup>          | <i>P. podlechii</i>                     | KP769958 <sup>l</sup>          |
|                                         | JX463161 <sup>c</sup>          |                                         | JX463161 <sup>c</sup>          |
| <i>P. pohlii</i>                        | EU258325 <sup>g</sup>          | <i>P. pohlii</i>                        | EU258325 <sup>g</sup>          |
|                                         | AY032840 <sup>i</sup>          |                                         | AY032799 <sup>i</sup>          |
| <i>P. punctata</i>                      | AY210946 <sup>i</sup>          | <i>P. punctata</i>                      | AY210927 <sup>i</sup>          |
|                                         | JX470851 <sup>c</sup>          |                                         | JX470851 <sup>c</sup>          |
| <i>P. pusilla</i>                       | JX470809 <sup>c</sup>          | <i>P. pusilla</i>                       | JX470809 <sup>c</sup>          |
| <i>P. rovirosae</i>                     | KP769911 <sup>l</sup>          | <i>P. rovirosae</i>                     | KP769959 <sup>l</sup>          |
|                                         | JX470810 <sup>c</sup>          |                                         | JX470810 <sup>c</sup>          |
| <i>P. rubra</i>                         | AY032836 <sup>i</sup>          | <i>P. rubra</i>                         | AY032795 <sup>i</sup>          |
|                                         | AY632716 <sup>a</sup>          |                                         | AY632716 <sup>a</sup>          |
|                                         | JX470811 <sup>c</sup>          |                                         | JX470811 <sup>c</sup>          |
| <i>P. rufa</i>                          | AY210948 <sup>i</sup>          | <i>P. rufa</i>                          | AY210929 <sup>i</sup>          |
|                                         | JX470789 <sup>c</sup>          |                                         | JX470789 <sup>c</sup>          |
| <i>P. rugosissima</i>                   | JX470828 <sup>c</sup>          | <i>P. rugosissima</i>                   | JX470828 <sup>c</sup>          |
| <i>P. sagasteguii</i>                   | JX470785 <sup>c</sup>          | <i>P. sagasteguii</i>                   | JX470785 <sup>c</sup>          |
| <i>P. sandrae</i>                       | JX470852 <sup>c</sup>          | <i>P. sandrae</i>                       | JX470852 <sup>c</sup>          |
| <i>P. sanguinolenta</i>                 | KP769912 <sup>l</sup>          | <i>P. sanguinolenta</i>                 | KP769960 <sup>l</sup>          |
|                                         | JX470812 <sup>c</sup>          |                                         | JX470812 <sup>c</sup>          |
| <i>P. sexflora</i>                      | AY210949 <sup>i</sup>          | <i>P. sexflora</i>                      | AY210930 <sup>i</sup>          |
|                                         | JX463168 <sup>c</sup>          |                                         | JX463168 <sup>c</sup>          |
| <i>P. sexocellata</i>                   | JX470829—JX470830 <sup>c</sup> | <i>P. sexocellata</i>                   | JX470829—JX470830 <sup>c</sup> |
|                                         | JX463143—JX463146 <sup>c</sup> |                                         | JX463143—JX463146 <sup>c</sup> |
| <i>P. siamica</i>                       | DQ458212—DQ458216 <sup>b</sup> | <i>P. siamica</i>                       | DQ458212—DQ458216 <sup>b</sup> |
|                                         | DQ087424 <sup>f</sup>          |                                         | DQ087424 <sup>f</sup>          |
| <i>P. sicyoides</i>                     | AY632717 <sup>a</sup>          | <i>P. sicyoides</i>                     | AY632717 <sup>a</sup>          |
|                                         | JX470805 <sup>c</sup>          |                                         | JX470805 <sup>c</sup>          |
| <i>P. sodiroi</i>                       | JX470786 <sup>c</sup>          | <i>P. sodiroi</i>                       | JX470786 <sup>c</sup>          |
| <i>P. solomonii</i>                     | JX470787 <sup>c</sup>          | <i>P. solomonii</i>                     | JX470787 <sup>c</sup>          |
| <i>P. suberosa</i>                      | AY032841 <sup>i</sup>          | <i>P. suberosa</i>                      | AY032800 <sup>i</sup>          |
|                                         | AF454806 <sup>e</sup>          |                                         | AF454806 <sup>e</sup>          |
|                                         | AY632718 <sup>a</sup>          |                                         | AY632718 <sup>a</sup>          |
| <i>P. suberosa</i> var. <i>suberosa</i> | JX463108 <sup>c</sup>          | <i>P. suberosa</i> var. <i>suberosa</i> | JX463108 <sup>c</sup>          |



Table S2. Cont.

| <i>Decaloba</i> ITS1    |                                | <i>Decaloba</i> ITS2    |                                |
|-------------------------|--------------------------------|-------------------------|--------------------------------|
| Species                 | GenBank Access                 | Species                 | GenBank Access                 |
|                         | JX463110—JX463111 <sup>c</sup> |                         | JX463110—JX463111 <sup>c</sup> |
|                         | JX463119—JX463122 <sup>c</sup> |                         | JX463119—JX463122 <sup>c</sup> |
| <i>P. tacanensis</i>    | JX470794 <sup>c</sup>          | <i>P. tacanensis</i>    | JX470794 <sup>c</sup>          |
| <i>P. talamancensis</i> | AF454809 <sup>e</sup>          | <i>P. talamancensis</i> | AF454809 <sup>e</sup>          |
| <i>P. tatei</i>         | JX470853 <sup>c</sup>          | <i>P. tatei</i>         | JX470853 <sup>c</sup>          |
| <i>P. telesiphe</i>     | JX470854 <sup>c</sup>          | <i>P. telesiphe</i>     | JX470854 <sup>c</sup>          |
| <i>P. tenella</i>       | JX470832 <sup>c</sup>          | <i>P. tenella</i>       | JX470832 <sup>c</sup>          |
| <i>P. tenuiloba</i>     | AY632719 <sup>a</sup>          | <i>P. tenuiloba</i>     | AY632719 <sup>a</sup>          |
|                         | JX463159—JX463160 <sup>c</sup> |                         | JX463159—JX463160 <sup>c</sup> |
| <i>P. tonkinensis</i>   | DQ087425 <sup>f</sup>          | <i>P. tonkinensis</i>   | DQ087425 <sup>f</sup>          |
| <i>P. transversalis</i> | KP769913 <sup>l</sup>          | <i>P. transversalis</i> | KP769961 <sup>l</sup>          |
| <i>P. tricuspis</i>     | EU258455—EU258460 <sup>g</sup> | <i>P. tricuspis</i>     | EU258455—EU258460 <sup>g</sup> |
|                         | AY102348 <sup>i</sup>          |                         | AY102368 <sup>i</sup>          |
|                         | JX470855 <sup>c</sup>          |                         | JX470855 <sup>c</sup>          |
| <i>P. trifasciata</i>   | KP769885 <sup>l</sup>          | <i>P. trifasciata</i>   | KP769933 <sup>l</sup>          |
| <i>P. truncata</i>      | AY102354 <sup>i</sup>          | <i>P. truncata</i>      | AY102374 <sup>i</sup>          |
|                         | JX470788 <sup>c</sup>          |                         | JX470788 <sup>c</sup>          |
| <i>P. tuberosa</i>      | JX470856 <sup>c</sup>          | <i>P. tuberosa</i>      | JX470856 <sup>c</sup>          |
| <i>P. tulae</i>         | AY102352 <sup>i</sup>          | <i>P. tulae</i>         | AY102372 <sup>i</sup>          |
| <i>P. urnifolia</i>     | EU258461—EU258465 <sup>g</sup> | <i>P. urnifolia</i>     | EU258461—EU258465 <sup>g</sup> |
|                         | JX470857 <sup>c</sup>          |                         | JX470857 <sup>c</sup>          |
| <i>P. vespertilio</i>   | KP769916 <sup>l</sup>          | <i>P. vespertilio</i>   | KP769964 <sup>l</sup>          |
|                         | JX470858 <sup>c</sup>          |                         | JX470858 <sup>c</sup>          |

Table S2. Cont.

| <i>Decaloba</i> ITS1                      |                                | <i>Decaloba</i> ITS2                      |                                |
|-------------------------------------------|--------------------------------|-------------------------------------------|--------------------------------|
| Species                                   | GenBank Access                 | Species                                   | GenBank Access                 |
| <i>P. viridescens</i>                     | JX470859 <sup>c</sup>          | <i>P. viridescens</i>                     | JX470859 <sup>c</sup>          |
| <i>P. viridiflora</i>                     | JX463155—JX463157 <sup>c</sup> | <i>P. viridiflora</i>                     | JX463155—JX463157 <sup>c</sup> |
| <i>P. wilsonii</i>                        | DQ458072 <sup>b</sup>          | <i>P. wilsonii</i>                        | DQ458072 <sup>b</sup>          |
|                                           | DQ087426                       |                                           | DQ087426                       |
| <i>P. xiizkodz</i>                        | AY210950 <sup>i</sup>          | <i>P. xiizkodz</i>                        | AY210931 <sup>i</sup>          |
|                                           | DQ238786 <sup>o</sup>          |                                           | DQ238786 <sup>o</sup>          |
|                                           | JX463102—JX463106 <sup>c</sup> |                                           | JX463102—JX463106 <sup>c</sup> |
|                                           | JX470795 <sup>c</sup>          |                                           | JX470795 <sup>c</sup>          |
| <i>P. xiizkodz</i> subsp. <i>itzensis</i> | JX463101 <sup>c</sup>          | <i>P. xiizkodz</i> subsp. <i>itzensis</i> | JX463101 <sup>c</sup>          |
| <i>P. xishuangbannaensis</i>              | DQ458071 <sup>b</sup>          | <i>P. xishuangbannaensis</i>              | DQ458071 <sup>b</sup>          |

<sup>a</sup> Krosnick, S.E.; Freudenstein, J.V. Monophyly and floral character homology of old world *Passiflora* (Subgenus *Decaloba*: Supersection *Disemma*). *Syst. Bot.* **2005**, *30*, 139–152; <sup>b</sup> Krosnick, S.E.; Freudenstein, J.V. Phylogenetic relationships among the Old World species of *Passiflora* L. (Subgenus *Decaloba*: Supersection *Disemma*). Unpublished; <sup>c</sup> Krosnick, S.E.; Porter-Utley, K.E.; MacDougal, J.M.; Jørgensen, P.M.; McDade, L.A. New insights into the evolution of *Passiflora* subgenus *Decaloba* (Passifloraceae): phylogenetic relationships and morphological synapomorphies. *Syst. Bot.* **2013**, *38*, 692–713; <sup>d</sup> Hearn, D.J. *Adenia* (Passifloraceae) and its adaptative radiation: Phylogeny and growth form diversification. *Syst. Bot.* **2006**, *31*, 805–821; <sup>e</sup> Ossowski, A.M.; Hunter, F.F. Coevolution of *Heliconius* spp. and *Passiflora* spp.: A phylogenetic comparison. Unpublished; <sup>f</sup> Krosnick, S.E.; Freudenstein, J.V. Patterns of anomalous floral development in the Asian *Passiflora* (subgenus *Decaloba*: supersection *Disemma*). *Am. J. Bot.* **2006**, *93*, 620–636; <sup>g</sup> Mäder, G.; Zamberlan, P.M.; Fagundes, N.J.R.; Magnus, T.; Salzano, F.M.; Bonatto, S.L.; Freitas, L.B. The use and limits of ITS data in the analysis of intraspecific variation in *Passiflora* L. (Passifloraceae). *Genet. Mol. Biol.* **2010**, *33*, 99–108; <sup>h</sup> Mäder, G.; Magnus, T.; Lorenz-Lemke, A.P.; *et al.* ITS subgenera and intraspecific variability in Brazilian *Passiflora*: Understanding molecular evolution. Unpublished; <sup>i</sup> Muschner, V.C.; Lorenz, A.P.; Cervi, A.C.; Bonatto, S.L.; Souza-Chies, T.T.; Salzano, F.M.; Freitas, L.B. A first molecular phylogenetic analysis of *Passiflora* (Passifloraceae). *Am. J. Bot.* **2003**, *90*, 1229–1238; <sup>j</sup> Krosnick, S.E.; Xun-Lin, Y.; Deng, Y. The rediscovery of *Passiflora kwangtungensis* Merr. (subgenus *Decaloba* supersection *Disemma*): A critically endangered Chinese endemic. *PhytoKeys* **2013**, *23*, 55–74; <sup>k</sup> Kress, W.J.; Wurdack, K.J.; Zimmer, E.A.; Weigt, L.A.; Janzen, D.H. Use of DNA barcodes to identify flowering plants. *Proc. Natl. Acad. Sci. USA* **2005**, *102*, 8369–8374; <sup>l</sup> Sequences from Giudicelli *et al.* (in prep); <sup>m</sup> Krosnick, S.E.; Ford, A.; Freudenstein, J.V. Resolving the phylogenetic position of *Hollrungia* and *Tetrapathaea*: The end of two monotypic genera in Passifloraceae. Unpublished; <sup>n</sup> Kay, E.E. Floral Evolutionary Ecology of *Passiflora*: subgenera *Murucuia*, *Pseudomurucuia* and *Astephia*. Unpublished; <sup>o</sup> Muschner, V.C.; Lorenz-Lemke, A.P.; Vecchia, M.; Bonatto, S.L.; Salzano, F.M.; Freitas, L.B. Differential organellar inheritance in *Passiflora* (Passifloraceae) subgenera. Unpublished.

Table S2. Cont.

| <i>Deidamioides</i> ITS1 |                                                | <i>Deidamioides</i> ITS2 |                                                |
|--------------------------|------------------------------------------------|--------------------------|------------------------------------------------|
| Species                  | GenBank Access                                 | Species                  | GenBank Access                                 |
| <i>P. arbelaezii</i>     | DQ521278 <sup>a</sup><br>AY632703 <sup>b</sup> | <i>P. arbelaezii</i>     | DQ521278 <sup>a</sup><br>AY632703 <sup>b</sup> |
| <i>P. cirrhiflora</i>    | DQ458063 <sup>c</sup>                          | <i>P. cirrhiflora</i>    | DQ458063 <sup>c</sup>                          |
| <i>P. contracta</i>      | KF196619—KF196691 <sup>d</sup>                 | <i>P. contracta</i>      | KF196619—KF196691 <sup>d</sup>                 |
| <i>P. deidamioides</i>   | EU907257—EU907265 <sup>e</sup>                 | <i>P. deidamioides</i>   | EU907257—EU907265 <sup>e</sup>                 |
| <i>P. discophora</i>     | DQ458061 <sup>c</sup><br>JX470772 <sup>f</sup> | <i>P. discophora</i>     | DQ458061 <sup>c</sup><br>JX470772 <sup>f</sup> |
| <i>P. gracillima</i>     | JX470773 <sup>f</sup>                          | <i>P. gracillima</i>     | JX470773 <sup>f</sup>                          |
| <i>P. obovata</i>        | DQ458064 <sup>c</sup>                          | <i>P. obovata</i>        | DQ458064 <sup>c</sup>                          |
| <i>P. ovalis</i>         | KF196601—KF196618 <sup>d</sup>                 | <i>P. ovalis</i>         | KF196601—KF196618 <sup>d</sup>                 |

<sup>a</sup> Hearn, D.J. *Adenia* (Passifloraceae) and its adaptative radiation: Phylogeny and growth form diversification. *Syst. Bot.* **2006**, *31*, 805–821; <sup>b</sup> Krosnick, S.E.; Freudenstein, J.V. Monophyly and floral character homology of old world *Passiflora* (Subgenus *Decaloba*: Supersection *Disemma*). *Syst. Bot.* **2005**, *30*, 139–152; <sup>c</sup> Krosnick, S.E.; Ford, A.; Freudenstein, J.V. Resolving the phylogenetic position of *Hollrungia* and *Tetrapathaea*: The end of two monotypic genera in Passifloraceae. Unpublished; <sup>d</sup> Cazé, A.L.R.; Mäder, G.; Bonatto, S.L.; Freitas, L.B. A molecular systematic analysis of *Passiflora ovalis* and *Passiflora contracta* (Passifloraceae). *Phytotaxa* **2013**, *132*, 39–46; <sup>e</sup> Mäder, G.; Magnus, T.; Lorenz-Lemke, A.P.; *et al.* ITS subgenera and intraspecific variability in Brazilian *Passiflora*: Understanding molecular evolution. Unpublished; <sup>f</sup> Krosnick, S.E.; Porter-Utley, K.E.; MacDougal, J.M.; Jørgensen, P.M.; McDade, L.A. New insights into the evolution of *Passiflora* subgenus *Decaloba* (Passifloraceae): Phylogenetic relationships and morphological synapomorphies. *Syst. Bot.* **2013**, *38*, 692–713.

Table S2. Cont.

| <i>Passiflora</i> ITS1 |                                | <i>Passiflora</i> ITS2 |                                |
|------------------------|--------------------------------|------------------------|--------------------------------|
| Species                | GenBank Access                 | Species                | GenBank Access                 |
| <i>P. actinia</i>      | AY032832 <sup>a</sup>          | <i>P. actinia</i>      | AY032791 <sup>a</sup>          |
|                        | AY542629—AY542644 <sup>b</sup> |                        | AY219264—AY219279 <sup>b</sup> |
|                        | AY219240—AY219255 <sup>b</sup> |                        | AY542658—AY542673 <sup>b</sup> |
| <i>P. acuminata</i>    | KP769886 <sup>c</sup>          | <i>P. acuminata</i>    | KP769934 <sup>c</sup>          |
| <i>P. alata</i>        | AY032826 <sup>a</sup>          | <i>P. alata</i>        | AY032785 <sup>a</sup>          |
|                        | AY858145—AY858229 <sup>d</sup> |                        | AY858263—AY858347 <sup>d</sup> |
|                        | AF454800 <sup>e</sup>          |                        | AF454800 <sup>e</sup>          |
| <i>P. ambigua</i>      | AF454801 <sup>e</sup>          | <i>P. ambigua</i>      | AF454801 <sup>e</sup>          |
| <i>P. amethystina</i>  | EU258307—EU258309 <sup>f</sup> | <i>P. amethystina</i>  | EU258307—EU258309 <sup>f</sup> |
|                        | AY102347 <sup>a</sup>          |                        | AY102367 <sup>a</sup>          |
| <i>P. ampullacea</i>   | AY632720 <sup>g</sup>          | <i>P. ampullacea</i>   | AY632720 <sup>g</sup>          |
| <i>P. caerulea</i>     | EU258310—EU258316 <sup>f</sup> | <i>P. caerulea</i>     | EU258310—EU258316 <sup>f</sup> |
|                        | AY032824 <sup>a</sup>          |                        | AY032782 <sup>a</sup>          |
|                        | AF454802 <sup>e</sup>          |                        | AF454802 <sup>e</sup>          |
| <i>P. campanulata</i>  | AY032829 <sup>a</sup>          | <i>P. campanulata</i>  | AY032788 <sup>a</sup>          |
| <i>P. cerasina</i>     | KP769887 <sup>c</sup>          | <i>P. cerasina</i>     | KP769935 <sup>c</sup>          |
| <i>P. chrysophylla</i> | KP769906 <sup>c</sup>          | <i>P. chrysophylla</i> | KP769954 <sup>c</sup>          |
| <i>P. cincinnata</i>   | EU258353—EU258358 <sup>f</sup> | <i>P. cincinnata</i>   | EU258353—EU258358 <sup>f</sup> |
|                        | DQ344629 <sup>h</sup>          |                        | DQ344629 <sup>h</sup>          |
|                        | AY102363 <sup>a</sup>          |                        | AY102383 <sup>a</sup>          |

Table S2. Cont.

| <i>Passiflora</i> ITS1    |                                | <i>Passiflora</i> ITS2    |                                |
|---------------------------|--------------------------------|---------------------------|--------------------------------|
| Species                   | GenBank Access                 | Species                   | GenBank Access                 |
| <i>P. coccinea</i>        | KP769888 <sup>c</sup>          | <i>P. coccinea</i>        | KP769936 <sup>c</sup>          |
| <i>P. edmundoi</i>        | EU258370 <sup>f</sup>          | <i>P. edmundoi</i>        | EU258370 <sup>f</sup>          |
|                           | EU258373—EU258374 <sup>f</sup> |                           | EU258373—EU258374 <sup>f</sup> |
|                           | AY102351 <sup>a</sup>          |                           | AY102371 <sup>a</sup>          |
| <i>P. edulis</i>          | EU258375—EU258384 <sup>f</sup> | <i>P. edulis</i>          | EU258375—EU258384 <sup>f</sup> |
|                           | AY032831 <sup>a</sup>          |                           | AY032790 <sup>a</sup>          |
|                           | JX470774 <sup>i</sup>          |                           | JX470774 <sup>i</sup>          |
|                           | AF454803 <sup>e</sup>          |                           | AF454803 <sup>e</sup>          |
| <i>P. eichleriana</i>     | EU258317—EU258319 <sup>f</sup> | <i>P. eichleriana</i>     | EU258317—EU258319 <sup>f</sup> |
|                           | AY102346 <sup>a</sup>          |                           | AY102366 <sup>a</sup>          |
| <i>P. elegans</i>         | AY032833 <sup>a</sup>          | <i>P. elegans</i>         | AY032792 <sup>a</sup>          |
|                           | AY542645—AY542657 <sup>b</sup> |                           | AY219280—AY219286 <sup>b</sup> |
|                           | AY219256—AY219262 <sup>b</sup> |                           | AY542674—AY542686 <sup>b</sup> |
| <i>P. foetida</i>         | DQ521376 <sup>j</sup>          | <i>P. foetida</i>         | DQ521376 <sup>j</sup>          |
|                           | EU258385—EU258390 <sup>f</sup> |                           | EU258385—EU258390 <sup>f</sup> |
|                           | EU258393—EU258394 <sup>f</sup> |                           | EU258393—EU258394 <sup>f</sup> |
|                           | AY032834 <sup>a</sup>          |                           | AY032793 <sup>a</sup>          |
|                           | DQ238783 <sup>h</sup>          |                           | DQ238783 <sup>h</sup>          |
|                           | DQ458053 <sup>k</sup>          |                           | DQ458053 <sup>k</sup>          |
|                           | DQ499117 <sup>l</sup>          |                           | DQ499117 <sup>l</sup>          |
|                           | JQ723359 <sup>m</sup>          |                           | JQ723359 <sup>m</sup>          |
| <i>P. gabrielliana</i>    | AY210953 <sup>a</sup>          | <i>P. gabrielliana</i>    | AY210934 <sup>a</sup>          |
| <i>P. galbana</i>         | AY032843 <sup>a</sup>          | <i>P. galbana</i>         | AY032784 <sup>a</sup>          |
| <i>P. garckeii</i>        | AY210952 <sup>a</sup>          | <i>P. garckeii</i>        | AY210933 <sup>a</sup>          |
| <i>P. glandulosa</i>      | KP769907 <sup>c</sup>          | <i>P. glandulosa</i>      | KP769955 <sup>c</sup>          |
| <i>P. hatsbachii</i>      | KP769889 <sup>c</sup>          | <i>P. hatsbachii</i>      | KP769937 <sup>c</sup>          |
| <i>P. incarnata</i>       | DQ344630 <sup>h</sup>          | <i>P. incarnata</i>       | DQ344630 <sup>h</sup>          |
| <i>P. ishnoclada</i>      | KP769890 <sup>c</sup>          | <i>P. ishnoclada</i>      | KP769938 <sup>c</sup>          |
| <i>P. jervensis</i>       | KP769891 <sup>c</sup>          | <i>P. jervensis</i>       | KP769939 <sup>c</sup>          |
| <i>P. jilekii</i>         | EU258320—EU258321 <sup>f</sup> | <i>P. jilekii</i>         | EU258320—EU258321 <sup>f</sup> |
|                           | AY102360 <sup>a</sup>          |                           | AY102380 <sup>a</sup>          |
| <i>P. kermesina</i>       | AY032825 <sup>a</sup>          | <i>P. kermesina</i>       | AY032783 <sup>a</sup>          |
| <i>P. laurifolia</i>      | KP769892 <sup>c</sup>          | <i>P. laurifolia</i>      | KP769940 <sup>c</sup>          |
| <i>P. loefgrenii</i>      | KP769893 <sup>c</sup>          | <i>P. loefgrenii</i>      | KP769941 <sup>c</sup>          |
| <i>P. luetzelburi</i>     | KP769894 <sup>c</sup>          | <i>P. luetzelburi</i>     | KP769942 <sup>c</sup>          |
| <i>P. maliformis</i>      | AY210956 <sup>a</sup>          | <i>P. maliformis</i>      | AY210937 <sup>a</sup>          |
| <i>P. mathewsii</i>       | KP769895 <sup>c</sup>          | <i>P. mathewsii</i>       | KP769943 <sup>c</sup>          |
| <i>P. mendoncaeii</i>     | AY102358 <sup>a</sup>          | <i>P. mendoncaeii</i>     | AY102378 <sup>a</sup>          |
| <i>P. menispermifolia</i> | AF454795 <sup>e</sup>          | <i>P. menispermifolia</i> | AF454795 <sup>e</sup>          |
| <i>P. miersii</i>         | EU258322 <sup>f</sup>          | <i>P. miersii</i>         | EU258322 <sup>f</sup>          |
|                           | EU907266—EU907269 <sup>n</sup> |                           | EU907266—EU907269 <sup>n</sup> |
|                           | AY102350 <sup>a</sup>          |                           | AY102370 <sup>a</sup>          |

Table S2. Cont.

| <i>Passiflora</i> ITS1    |                                | <i>Passiflora</i> ITS2    |                                |
|---------------------------|--------------------------------|---------------------------|--------------------------------|
| Species                   | GenBank Access                 | Species                   | GenBank Access                 |
| <i>P. mixta</i>           | KP769896 <sup>c</sup>          | <i>P. mixta</i>           | KP769944 <sup>c</sup>          |
| <i>P. mucronata</i>       | AY210951 <sup>a</sup>          | <i>P. mucronata</i>       | AY210932 <sup>a</sup>          |
| <i>P. mucugensis</i>      | KP769897 <sup>c</sup>          | <i>P. mucugensis</i>      | KP769945 <sup>c</sup>          |
| <i>P. nitida</i>          | KP769898 <sup>c</sup>          | <i>P. nitida</i>          | KP769946 <sup>c</sup>          |
| <i>P. odontophylla</i>    | KP769899 <sup>c</sup>          | <i>P. odontophylla</i>    | KP769947 <sup>c</sup>          |
| <i>P. oerstedii</i>       | AF454797 <sup>e</sup>          | <i>P. oerstedii</i>       | AF454797 <sup>e</sup>          |
| <i>P. palmeri</i>         | DQ238784 <sup>h</sup>          | <i>P. palmeri</i>         | DQ238784 <sup>h</sup>          |
| <i>P. pilosicorona</i>    | KP769900 <sup>c</sup>          | <i>P. pilosicorona</i>    | KP769948 <sup>c</sup>          |
| <i>P. platyloba</i>       | AF454798 <sup>e</sup>          | <i>P. platyloba</i>       | AF454798 <sup>e</sup>          |
| <i>P. quadrangularis</i>  | AY032827 <sup>a</sup>          | <i>P. quadrangularis</i>  | AY032786 <sup>a</sup>          |
|                           | AY636107 <sup>g</sup>          |                           | AY636107 <sup>g</sup>          |
|                           | AF454799 <sup>e</sup>          |                           | AF454799 <sup>e</sup>          |
| <i>P. racemosa</i>        | KP769901 <sup>c</sup>          | <i>P. racemosa</i>        | KP769949 <sup>c</sup>          |
| <i>P. recurva</i>         | AY102349 <sup>a</sup>          | <i>P. recurva</i>         | AY102369 <sup>a</sup>          |
| <i>P. reflexiflora</i>    | AY210947 <sup>a</sup>          | <i>P. reflexiflora</i>    | AY210928 <sup>a</sup>          |
| <i>P. serratifolia</i>    | AY210954 <sup>a</sup>          | <i>P. serratifolia</i>    | AY210935 <sup>a</sup>          |
| <i>P. serratodigitata</i> | AY636108 <sup>g</sup>          | <i>P. serratodigitata</i> | AY636108 <sup>g</sup>          |
|                           | AY210957 <sup>a</sup>          |                           | AY210938 <sup>a</sup>          |
| <i>P. setacea</i>         | AY102356 <sup>a</sup>          | <i>P. setacea</i>         | AY102376 <sup>a</sup>          |
| <i>P. setulosa</i>        | AY032828 <sup>a</sup>          | <i>P. setulosa</i>        | AY032787 <sup>a</sup>          |
| <i>P. sidiifolia</i>      | EU258435—EU258445 <sup>f</sup> | <i>P. sidiifolia</i>      | EU258435—EU258445 <sup>f</sup> |
|                           | AY102353 <sup>a</sup>          |                           | AY102373 <sup>a</sup>          |
| <i>P. speciosa</i>        | AY102362 <sup>a</sup>          | <i>P. speciosa</i>        | AY102382 <sup>a</sup>          |
| <i>P. sprucei</i>         | KP769902 <sup>c</sup>          | <i>P. sprucei</i>         | KP769950 <sup>c</sup>          |
| <i>P. tenuifila</i>       | EU258446—EU258454 <sup>f</sup> | <i>P. tenuifila</i>       | EU258446—EU258454 <sup>f</sup> |
| <i>P. trifoliata</i>      | KP769903 <sup>c</sup>          | <i>P. trifoliata</i>      | KP769951 <sup>c</sup>          |
| <i>P. trintae</i>         | KP769914 <sup>c</sup>          | <i>P. trintae</i>         | KP769962 <sup>c</sup>          |

Table S2. Cont.

| <i>Passiflora</i> ITS1 |                                                                                           | <i>Passiflora</i> ITS2 |                                                                                           |
|------------------------|-------------------------------------------------------------------------------------------|------------------------|-------------------------------------------------------------------------------------------|
| Species                | GenBank Access                                                                            | Species                | GenBank Access                                                                            |
| <i>P. tripartita</i>   | KP769904 <sup>c</sup>                                                                     | <i>P. tripartita</i>   | KP769952 <sup>c</sup>                                                                     |
| <i>P. trisecta</i>     | KP769905 <sup>c</sup>                                                                     | <i>P. trisecta</i>     | KP769953 <sup>c</sup>                                                                     |
| <i>P. umblicata</i>    | KP769915 <sup>c</sup>                                                                     | <i>P. umblicata</i>    | KP769963 <sup>c</sup>                                                                     |
| <i>P. urubiciensis</i> | EU258326 <sup>f</sup><br>AY102355 <sup>a</sup>                                            | <i>P. urubiciensis</i> | EU258326 <sup>f</sup><br>AY102375 <sup>a</sup>                                            |
| <i>P. villosa</i>      | EU258391—EU258392 <sup>f</sup><br>EU258466—EU258469 <sup>f</sup><br>AY102357 <sup>a</sup> | <i>P. villosa</i>      | EU258391—EU258392 <sup>f</sup><br>EU258466—EU258469 <sup>f</sup><br>AY102377 <sup>a</sup> |
| <i>P. vitifolia</i>    | AF454796 <sup>e</sup>                                                                     | <i>P. vitifolia</i>    | AF454796 <sup>e</sup>                                                                     |

<sup>a</sup> Muschner, V.C.; Lorenz, A.P.; Cervi, A.C.; Bonatto, S.L.; Souza-Chies, T.T.; Salzano, F.M.; Freitas, L.B. A first molecular phylogenetic analysis of *Passiflora* (Passifloraceae). *Am. J. Bot.* **2003**, *90*, 1229–1238; <sup>b</sup> Lorenz-Lemke, A.P.; Muschner, V.C.; Bonatto, S.L.; Cervi, A.C.; Salzano, F.M.; Freitas, L.B. Phylogeographic inferences concerning evolution of Brazilian *Passiflora actinia* and *P. elegans* (Passifloraceae) based on ITS (nrDNA) variation. *Ann. Bot.* **2005**, *95*, 799–806; <sup>c</sup> Sequences from Giudicelli *et al.* (in prep); <sup>d</sup> Koehler-Santos, P.; Lorenz-Lemke, A.P.; Muschner, V.C.; Salzano, F.M.; Freitas, L.B. Evolutionary implications of the intrapopulation diversity of *Passiflora alata*. Unpublished; <sup>e</sup> Ossowski, A.M.; Hunter, F.F. Coevolution of *Heliconius* spp. and *Passiflora* spp.: A phylogenetic comparison. Unpublished; <sup>f</sup> Mäder, G.; Zamberlan, P.M.; Fagundes, N.J.R.; Magnus, T.; Salzano, F.M.; Bonatto, S.L.; Freitas, L.B. The use and limits of ITS data in the analysis of intraspecific variation in *Passiflora* L. (Passifloraceae). *Genet. Mol. Biol.* **2010**, *33*, 99–108; <sup>g</sup> Krosnick, S.E.; Freudenstein, J.V. Monophyly and floral character homology of old world *Passiflora* (Subgenus *Decaloba*: Supersection *Disemma*). *Syst. Bot.* **2005**, *30*, 139–152; <sup>h</sup> Muschner, V.C.; Lorenz-Lemke, A.P.; Vecchia, M.; Bonatto, S.L.; Salzano, F.M.; Freitas, L.B. Differential organellar inheritance in *Passiflora* (Passifloraceae) subgenera. Unpublished; <sup>i</sup> Krosnick, S.E.; Porter-Utley, K.E.; MacDougal, J.M.; Jørgensen, P.M.; McDade, L.A. New insights into the evolution of *Passiflora* subgenus *Decaloba* (Passifloraceae): phylogenetic relationships and morphological synapomorphies. *Syst. Bot.* **2012**, *38*, 692–713; <sup>j</sup> Hearn, D.J. *Adenia* (Passifloraceae) and its adaptative radiation: Phylogeny and growth form diversification. *Syst. Bot.* **2006**, *31*, 805–821; <sup>k</sup> Krosnick, S.E.; Ford, A.; Freudenstein, J.V. Resolving the phylogenetic position of *Hollrungia* and *Tetraphaeta*: The end of two monotypic genera in Passifloraceae. Unpublished; <sup>l</sup> Wright, S.; Keeling, J.; Gillman, L. The road from santa Rosalia: A faster tempo of evolution on tropical climes. *Proc. Natl. Acad. Sci. USA* **2006**, *103*, 7718–7722; <sup>m</sup> Thulin, M.; Razafimandimbison, S.G.; Chafe, P.; Heidari, N.; Kool, A.; Shore, J.S. Phylogeny of the Turneracea clade (Passifloraceae): Trans-Atlantic disjunctions and two new genera in Africa. *Taxon* **2012**, *61*, 308–323; <sup>n</sup> Mäder, G.; Magnus, T.; Lorenz-Lemke, A.P.; *et al.* ITS subgenera and intraspecific variability in Brazilian *Passiflora*: Understanding molecular evolution. Unpublished.

**Table S3.** GenBank access numbers for Plastid Markers *matK*, *rbcL*, *trnL-psbA*, and *trnL* intron (UAA).

| Plastid Marker          | Species                   | GenBank Access                  |
|-------------------------|---------------------------|---------------------------------|
| <i>matK</i>             | <i>P. adenopoda</i>       | AY271608 <sup>1</sup>           |
|                         | <i>P. ambigua</i>         | JQ588571 <sup>2</sup>           |
|                         | <i>P. aurantioides</i>    | AB536631 <sup>3</sup>           |
|                         | <i>P. bicornis</i>        | JQ588572–JQ588574 <sup>2</sup>  |
|                         | <i>P. biflora</i>         | AY271610 <sup>1</sup>           |
|                         |                           | EU017067 <sup>4</sup>           |
|                         |                           | GU135122 <sup>5</sup>           |
|                         |                           | JQ588575–JQ588578 <sup>2</sup>  |
|                         | <i>P. caerulea</i>        | HM850927 <sup>6</sup>           |
|                         | <i>P. capsularis</i>      | AY271611 <sup>1</sup>           |
|                         | <i>P. cf. wilsonii</i>    | HG004937 <sup>7</sup>           |
|                         | <i>P. ciliata</i>         | JX661956 <sup>8</sup>           |
|                         | <i>P. coccinea</i>        | EF135577 <sup>9</sup>           |
|                         | <i>P. coriacea</i>        | AY271609 <sup>1</sup>           |
|                         | <i>P. costaricensis</i>   | JQ588579–JQ588580 <sup>2</sup>  |
|                         | <i>P. menispermifolia</i> | JQ588581 <sup>2</sup>           |
|                         | <i>P. murucuja</i>        | AY271612 <sup>1</sup>           |
|                         | <i>P. ornithoura</i>      | AY271613 <sup>1</sup>           |
|                         | <i>P. platyloba</i>       | JQ588582 <sup>2</sup>           |
|                         |                           | KJ751095 <sup>10</sup>          |
|                         | <i>P. quadrangularis</i>  | AB233808 <sup>11</sup>          |
|                         |                           | FM179937 <sup>12</sup>          |
|                         |                           | GQ248176 <sup>2</sup>           |
|                         |                           | KJ751079–KJ751081 <sup>10</sup> |
|                         |                           | KJ751085 <sup>10</sup>          |
|                         |                           | KJ751087 <sup>10</sup>          |
|                         |                           | KJ751090 <sup>10</sup>          |
|                         |                           | KJ751092 <sup>10</sup>          |
|                         |                           | KJ751096–KJ751100 <sup>10</sup> |
|                         | <i>P. sexflora</i>        | AY271614 <sup>1</sup>           |
| <i>P. suberosa</i>      | DQ401363 <sup>13</sup>    |                                 |
|                         | GU266608 <sup>14</sup>    |                                 |
| <i>P. talamancensis</i> | AY271615 <sup>1</sup>     |                                 |
| <i>P. tetrandra</i>     | AB536650 <sup>3</sup>     |                                 |
| <i>P. tulae</i>         | AY271616 <sup>1</sup>     |                                 |



Table S3. Cont.

| Plastid Marker          | Species                         | GenBank Access                  |
|-------------------------|---------------------------------|---------------------------------|
| <i>rbcL</i>             | <i>P. actinia</i>               | DQ123347 <sup>15</sup>          |
|                         |                                 | HQ900845 <sup>16</sup>          |
|                         | <i>P. alata</i>                 | DQ123348 <sup>15</sup>          |
|                         |                                 | HQ900846 <sup>16</sup>          |
|                         | <i>P. ambigua</i>               | DQ123349 <sup>15</sup>          |
|                         |                                 | JQ593081–JQ593084 <sup>17</sup> |
|                         | <i>P. amoena</i>                | DQ123301 <sup>15</sup>          |
|                         | <i>P. antioquiensis</i>         | DQ123342 <sup>15</sup>          |
|                         | <i>P. arborea</i>               | DQ123300 <sup>15</sup>          |
|                         | <i>P. aurantioides</i>          | AB536553 <sup>18</sup>          |
|                         | <i>P. auriculata</i>            | DQ445921 <sup>15</sup>          |
|                         |                                 | HQ900847 <sup>16</sup>          |
|                         | <i>P. bicornis</i>              | JQ593085–JQ593087 <sup>17</sup> |
|                         | <i>P. biflora</i>               | EU017122 <sup>19</sup>          |
|                         |                                 | GU135279 <sup>20</sup>          |
|                         |                                 | JQ593088–JQ593092 <sup>17</sup> |
|                         | <i>P. caerulea</i>              | DQ123350 <sup>15</sup>          |
|                         |                                 | HM850239 <sup>21</sup>          |
|                         |                                 | HQ900848 <sup>16</sup>          |
|                         | <i>P. campanulata</i>           | DQ123339 <sup>15</sup>          |
|                         |                                 | HQ900849 <sup>16</sup>          |
|                         | <i>P. candida</i>               | DQ123302 <sup>15</sup>          |
|                         | <i>P. capparidifolia</i>        | HQ900850 <sup>16</sup>          |
|                         | <i>P. capsularis</i>            | DQ123312 <sup>15</sup>          |
|                         |                                 | HQ900851 <sup>16</sup>          |
|                         | <i>P. cerasina</i>              | HQ900852 <sup>16</sup>          |
|                         | <i>P. ceratocarpa</i>           | DQ123303 <sup>15</sup>          |
|                         | <i>P. cerradensis</i>           | HQ900853 <sup>16</sup>          |
|                         | <i>P. ciliata</i>               | JX664062 <sup>22</sup>          |
|                         | <i>P. cincinnata</i>            | DQ123351 <sup>15</sup>          |
|                         | <i>P. cirrhiflora</i>           | DQ123377 <sup>15</sup>          |
|                         | <i>P. citrifolia</i>            | DQ123304 <sup>15</sup>          |
|                         | <i>P. clathrata</i>             | DQ123336 <sup>15</sup>          |
|                         | <i>P. coccinea</i>              | DQ123333 <sup>15</sup>          |
|                         |                                 | HQ900854 <sup>16</sup>          |
|                         | <i>P. coriacea</i>              | DQ123313 <sup>15</sup>          |
| <i>P. costaricensis</i> | JQ593093–JQ593094 <sup>17</sup> |                                 |
| <i>P. cuprea</i>        | DQ123378 <sup>15</sup>          |                                 |
| <i>P. deidamioides</i>  | DQ445925 <sup>15</sup>          |                                 |
|                         | HQ900855 <sup>16</sup>          |                                 |
| <i>P. edmundoi</i>      | DQ123352 <sup>15</sup>          |                                 |
|                         | HQ900856 <sup>16</sup>          |                                 |

Table S3. Cont.

| Plastid Marker        | Species                                       | GenBank Access                  |
|-----------------------|-----------------------------------------------|---------------------------------|
| <i>rbcL</i>           | <i>P. edulis</i>                              | DQ123353 <sup>15</sup>          |
|                       |                                               | GQ436714 <sup>23</sup>          |
|                       |                                               | HG765072 <sup>24</sup>          |
|                       |                                               | HQ900857 <sup>16</sup>          |
|                       | <i>P. eichleriana</i>                         | DQ123354 <sup>15</sup>          |
|                       |                                               | HQ900858 <sup>16</sup>          |
|                       | <i>P. elegans</i>                             | DQ123355 <sup>15</sup>          |
|                       | <i>P. exura</i>                               | DQ123356 <sup>15</sup>          |
|                       | <i>P. foetida</i>                             | DQ123337 <sup>15</sup>          |
|                       |                                               | HQ900859 <sup>16</sup>          |
|                       |                                               | KF425764 <sup>25</sup>          |
|                       | <i>P. gabrielliana</i>                        | DQ123357 <sup>15</sup>          |
|                       | <i>P. galbana</i>                             | DQ123358 <sup>15</sup>          |
|                       |                                               | HQ900860 <sup>16</sup>          |
|                       | <i>P. garckeii</i>                            | DQ123359 <sup>15</sup>          |
|                       | <i>P. gardneri</i>                            | HQ900861 <sup>16</sup>          |
|                       | <i>P. gilbertii</i>                           | DQ445922 <sup>15</sup>          |
|                       |                                               | HQ900862 <sup>16</sup>          |
|                       | <i>P. haematostigma</i>                       | DQ123305 <sup>15</sup>          |
|                       | <i>P. hatschbachii</i>                        | HQ900863 <sup>16</sup>          |
|                       | <i>P. helleri</i>                             | DQ123314 <sup>15</sup>          |
|                       | <i>P. incarnata</i>                           | DQ123360 <sup>15</sup>          |
|                       |                                               | EF590556 <sup>26</sup>          |
|                       |                                               | GQ248664 <sup>27</sup>          |
|                       |                                               | HF565321 <sup>28</sup>          |
|                       |                                               | HG765070–HG765071 <sup>24</sup> |
|                       |                                               | HQ900864 <sup>16</sup>          |
|                       | <i>P. iodocarpa</i>                           | HQ900865 <sup>16</sup>          |
|                       | <i>P. ishnoclada</i>                          | HQ900866 <sup>16</sup>          |
|                       | <i>P. jilekii</i>                             | DQ123361 <sup>15</sup>          |
|                       |                                               | HQ900867 <sup>16</sup>          |
|                       | <i>P. kawensis</i>                            | DQ123306 <sup>15</sup>          |
|                       | <i>P. lancetillensis</i>                      | DQ123331 <sup>15</sup>          |
|                       | <i>P. leptoclada</i>                          | DQ445923 <sup>15</sup>          |
|                       |                                               | HQ900869 <sup>16</sup>          |
|                       | <i>P. ligularis</i>                           | HQ900870 <sup>16</sup>          |
|                       | <i>P. lindeniana</i>                          | DQ123307 <sup>15</sup>          |
|                       | <i>P. lobbii</i> subsp. <i>ayaucuchoensis</i> | DQ123315 <sup>15</sup>          |
|                       | <i>P. lobbii</i> subsp. <i>obtusiloba</i>     | DQ123316 <sup>15</sup>          |
|                       | <i>P. loefgrenii</i>                          | HQ900871 <sup>16</sup>          |
|                       | <i>P. luetzelburgii</i>                       | DQ123384 <sup>15</sup>          |
| <i>P. lutea</i>       | DQ006111 <sup>29</sup>                        |                                 |
| <i>P. macrophylla</i> | DQ123308 <sup>15</sup>                        |                                 |
| <i>P. maliformis</i>  | DQ123362 <sup>15</sup>                        |                                 |
| <i>P. manicata</i>    | DQ123344 <sup>15</sup>                        |                                 |

Table S3. Cont.

| Plastid Marker         | Species                   | GenBank Access                  |
|------------------------|---------------------------|---------------------------------|
| <i>rbcL</i>            | <i>P. mansoi</i>          | DQ123309 <sup>15</sup>          |
|                        | <i>P. mathewsii</i>       | DQ123380 <sup>15</sup>          |
|                        | <i>P. mendoncae</i>       | DQ123385 <sup>15</sup>          |
|                        | <i>P. menispermifolia</i> | JQ593095–JQ593096 <sup>17</sup> |
|                        | <i>P. micropetala</i>     | DQ445924 <sup>15</sup>          |
|                        |                           | HQ900872 <sup>16</sup>          |
|                        | <i>P. microstipula</i>    | DQ123332 <sup>15</sup>          |
|                        | <i>P. miersii</i>         | DQ123363 <sup>15</sup>          |
|                        |                           | HQ900873 <sup>16</sup>          |
|                        | <i>P. misera</i>          | DQ123317 <sup>15</sup>          |
|                        |                           | HQ900874 <sup>16</sup>          |
|                        | <i>P. mixta</i>           | DQ123381 <sup>15</sup>          |
|                        | <i>P. morifolia</i>       | DQ123318 <sup>15</sup>          |
|                        |                           | HQ900875 <sup>16</sup>          |
|                        | <i>P. mucronata</i>       | HQ900876 <sup>16</sup>          |
|                        | <i>P. multiflora</i>      | DQ123297 <sup>15</sup>          |
|                        | <i>P. murucuja</i>        | DQ123345 <sup>15</sup>          |
|                        | <i>P. nitida</i>          | DQ123364 <sup>15</sup>          |
|                        |                           | HQ900878 <sup>16</sup>          |
|                        | <i>P. odontophylla</i>    | DQ123365 <sup>15</sup>          |
|                        | <i>P. organensis</i>      | DQ123319 <sup>15</sup>          |
|                        |                           | HQ900877 <sup>16</sup>          |
|                        | <i>P. ornithoura</i>      | DQ123320 <sup>15</sup>          |
|                        | <i>P. ovalis</i>          | DQ123401 <sup>15</sup>          |
|                        | <i>P. palmeri</i>         | DQ123338 <sup>15</sup>          |
|                        |                           | HQ900879 <sup>16</sup>          |
|                        | <i>P. penduliflora</i>    | DQ123298 <sup>15</sup>          |
|                        | <i>P. picturata</i>       | HQ900880 <sup>16</sup>          |
|                        | <i>P. pilosicorona</i>    | HQ900881 <sup>16</sup>          |
|                        | <i>P. pittieri</i>        | DQ123310 <sup>15</sup>          |
|                        | <i>P. platyloba</i>       | HQ900882 <sup>16</sup>          |
|                        |                           | JQ593097–JQ593099 <sup>17</sup> |
|                        | <i>P. pohlii</i>          | DQ123321 <sup>15</sup>          |
|                        |                           | HQ900883 <sup>16</sup>          |
|                        | <i>P. punctata</i>        | DQ123322 <sup>15</sup>          |
|                        | <i>P. quadrangularis</i>  | AB233912 <sup>30</sup>          |
|                        |                           | DQ123366 <sup>15</sup>          |
|                        |                           | EF590557 <sup>26</sup>          |
|                        |                           | GQ248665 <sup>27</sup>          |
|                        |                           | L01940 <sup>31</sup>            |
| <i>P. racemosa</i>     | DQ123311 <sup>15</sup>    |                                 |
|                        | HQ900884 <sup>16</sup>    |                                 |
| <i>P. recurva</i>      | DQ123367 <sup>15</sup>    |                                 |
| <i>P. reflexiflora</i> | DQ123386 <sup>15</sup>    |                                 |
| <i>P. rhamnifolia</i>  | DQ123299 <sup>15</sup>    |                                 |

Table S3. Cont.

| Plastid Marker       | Species                         | GenBank Access                  |
|----------------------|---------------------------------|---------------------------------|
| <i>rbcL</i>          | <i>P. riparia</i>               | DQ123368 <sup>15</sup>          |
|                      | <i>P. rufa</i>                  | DQ123323 <sup>15</sup>          |
|                      | <i>P. serratifolia</i>          | DQ123369 <sup>15</sup>          |
|                      | <i>P. serratodigitata</i>       | DQ123370 <sup>15</sup>          |
|                      |                                 | HQ900885 <sup>16</sup>          |
|                      | <i>P. setacea</i>               | DQ123371 <sup>15</sup>          |
|                      | <i>P. setulosa</i>              | DQ123340 <sup>15</sup>          |
|                      | <i>P. sexflora</i>              | DQ123324 <sup>15</sup>          |
|                      | <i>P. sidiifolia</i>            | DQ123372 <sup>15</sup>          |
|                      |                                 | HQ900886–HQ900887 <sup>16</sup> |
|                      | <i>P. speciosa</i>              | DQ123334 <sup>15</sup>          |
|                      | <i>P. sprucei</i>               | DQ123373 <sup>15</sup>          |
|                      | <i>P. suberosa</i>              | DQ123325 <sup>15</sup>          |
|                      |                                 | HQ900888 <sup>16</sup>          |
|                      | <i>P. subrotunda</i>            | HQ900889 <sup>16</sup>          |
|                      | <i>P. tacsonioides</i>          | DQ123379 <sup>15</sup>          |
|                      | <i>P. talamancensis</i>         | DQ123326 <sup>15</sup>          |
|                      | <i>P. tenuifila</i>             | DQ123374 <sup>15</sup>          |
|                      | <i>P. tetrandra</i>             | AB536572 <sup>18</sup>          |
|                      | <i>P. tricuspis</i>             | DQ123327 <sup>15</sup>          |
|                      |                                 | HQ900890 <sup>16</sup>          |
|                      | <i>P. trifasciata</i>           | DQ123328 <sup>15</sup>          |
|                      | <i>P. trifoliata</i>            | DQ123383 <sup>15</sup>          |
|                      | <i>P. trintae</i>               | DQ123375 <sup>15</sup>          |
|                      | <i>P. tripartita</i>            | DQ123382 <sup>15</sup>          |
|                      | <i>P. trisecta</i>              | DQ123343 <sup>15</sup>          |
|                      | <i>P. truncata</i>              | HQ900891 <sup>16</sup>          |
|                      | <i>P. tryphostemmatoides</i>    | DQ123388 <sup>15</sup>          |
|                      | <i>P. tulae</i>                 | DQ123346 <sup>15</sup>          |
|                      |                                 | HQ900892 <sup>16</sup>          |
|                      | <i>P. umbilicata</i>            | DQ123387 <sup>15</sup>          |
|                      | <i>P. urubiciensis</i>          | HQ900893 <sup>16</sup>          |
|                      | <i>P. vespertilio</i>           | DQ123329 <sup>15</sup>          |
|                      | HQ900894 <sup>16</sup>          |                                 |
| <i>P. villosa</i>    | DQ123341 <sup>15</sup>          |                                 |
| <i>P. vitifolia</i>  | DQ123335 <sup>15</sup>          |                                 |
|                      | HQ900895 <sup>16</sup>          |                                 |
|                      | JQ593100–JQ593102 <sup>17</sup> |                                 |
| <i>P. watsoniana</i> | DQ123376 <sup>15</sup>          |                                 |
|                      | HQ900896 <sup>16</sup>          |                                 |
| <i>P. xiikzodz</i>   | DQ123330 <sup>15</sup>          |                                 |

Table S3. Cont.

| Plastid Marker   | Species                  | GenBank Access                                                                                       |
|------------------|--------------------------|------------------------------------------------------------------------------------------------------|
| <i>trnH-psbA</i> | <i>P. actinia</i>        | AY032807 <sup>32</sup><br>AY219288–AY219299 <sup>33</sup>                                            |
|                  | <i>P. alata</i>          | AY032808 <sup>32</sup>                                                                               |
|                  | <i>P. biflora</i>        | GU135451 <sup>34</sup>                                                                               |
|                  | <i>P. caerulea</i>       | AY032816 <sup>32</sup><br>AY220135 <sup>35</sup>                                                     |
|                  | <i>P. campanulata</i>    | AY032812 <sup>32</sup>                                                                               |
|                  | <i>P. capsularis</i>     | AY032822 <sup>32</sup>                                                                               |
|                  | <i>P. cincinnata</i>     | DQ238756 <sup>36</sup>                                                                               |
|                  | <i>P. coriacea</i>       | DQ238763 <sup>36</sup>                                                                               |
|                  | <i>P. edulis</i>         | AY032811 <sup>32</sup>                                                                               |
|                  | <i>P. elegans</i>        | AY032806 <sup>32</sup><br>AY219300–AY219310 <sup>33</sup>                                            |
|                  | <i>P. foetida</i>        | AY032814 <sup>32</sup><br>DQ238759 <sup>36</sup><br>AY220136 <sup>35</sup>                           |
|                  | <i>P. galbana</i>        | AY032817 <sup>32</sup><br>AY220137 <sup>35</sup>                                                     |
|                  | <i>P. haematostigma</i>  | AY032819 <sup>32</sup>                                                                               |
|                  | <i>P. incarnata</i>      | EF590722 <sup>37</sup><br>GQ248361 <sup>38</sup><br>DQ238757 <sup>36</sup><br>AY032810 <sup>32</sup> |
|                  | <i>P. jilekii</i>        | AY220138 <sup>35</sup>                                                                               |
|                  | <i>P. kermesina</i>      | AY032815 <sup>32</sup>                                                                               |
|                  | <i>P. lutea</i>          | DQ006208 <sup>39</sup>                                                                               |
|                  | <i>P. misera</i>         | AY032804 <sup>32</sup>                                                                               |
|                  | <i>P. morifolia</i>      | AY032805 <sup>32</sup>                                                                               |
|                  | <i>P. organensis</i>     | AY032803 <sup>32</sup>                                                                               |
|                  | <i>P. palmeri</i>        | DQ249919 <sup>36</sup>                                                                               |
|                  | <i>P. pohlii</i>         | AY032802 <sup>32</sup>                                                                               |
|                  | <i>P. quadrangularis</i> | EF590723 <sup>37</sup><br>AY032809 <sup>32</sup><br>GQ248362 <sup>38</sup>                           |
|                  | <i>P. rubra</i>          | AY032821 <sup>32</sup>                                                                               |
|                  | <i>P. setulosa</i>       | AY032818 <sup>32</sup>                                                                               |
|                  | <i>P. sidiifolia</i>     | AY220139 <sup>35</sup>                                                                               |
|                  | <i>P. sprucei</i>        | DQ249920 <sup>36</sup>                                                                               |
|                  | <i>P. suberosa</i>       | AY032820 <sup>32</sup>                                                                               |
|                  | <i>P. tenuifila</i>      | AY032813 <sup>32</sup><br>AY220140 <sup>35</sup>                                                     |
|                  | <i>P. xiikzodz</i>       | DQ238762 <sup>36</sup>                                                                               |

Table S3. Cont.

| Plastid Marker           | Species                   | GenBank Access                  |
|--------------------------|---------------------------|---------------------------------|
| <i>trnL</i> (UAA) intron | <i>P. actinia</i>         | HQ900949 <sup>40</sup>          |
|                          |                           | DQ123065 <sup>41</sup>          |
|                          | <i>P. acuminata</i>       | DQ123066 <sup>41</sup>          |
|                          | <i>P. adenopoda</i>       | AY632727 <sup>42</sup>          |
|                          | <i>P. alata</i>           | AF454778 <sup>43</sup>          |
|                          |                           | HQ900950 <sup>40</sup>          |
|                          |                           | DQ123067 <sup>41</sup>          |
|                          | <i>P. alnifolia</i>       | JX470862 <sup>44</sup>          |
|                          | <i>P. ambigua</i>         | AF454779 <sup>43</sup>          |
|                          |                           | DQ123068 <sup>41</sup>          |
|                          | <i>P. amethystina</i>     | DQ123069 <sup>41</sup>          |
|                          | <i>P. amoena</i>          | DQ123017 <sup>41</sup>          |
|                          | <i>P. ampullacea</i>      | AY632745 <sup>42</sup>          |
|                          | <i>P. anadenia</i>        | JX470863 <sup>44</sup>          |
|                          | <i>P. antioquiensis</i>   | DQ123060 <sup>41</sup>          |
|                          | <i>P. apoda</i>           | JX470864 <sup>44</sup>          |
|                          | <i>P. arbelaezii</i>      | AY632728 <sup>42</sup>          |
|                          | <i>P. arborea</i>         | JX470865 <sup>44</sup>          |
|                          |                           | DQ123018 <sup>41</sup>          |
|                          | <i>P. aurantia</i>        | AY632729 <sup>42</sup>          |
|                          | <i>P. auriculata</i>      | AF454780 <sup>43</sup>          |
|                          |                           | HQ900951 <sup>40</sup>          |
|                          |                           | DQ284534 <sup>45</sup>          |
|                          | <i>P. bicornis</i>        | JX470866 <sup>44</sup>          |
|                          | <i>P. biflora</i>         | AF454781 <sup>43</sup>          |
|                          |                           | JX470867 <sup>44</sup>          |
|                          |                           | AY632730 <sup>42</sup>          |
|                          | <i>P. boenderi</i>        | JX470868 <sup>44</sup>          |
|                          | <i>P. bryonioides</i>     | JX470869 <sup>44</sup>          |
|                          | <i>P. caerulea</i>        | AF454784 <sup>43</sup>          |
|                          |                           | HQ900952 <sup>40</sup>          |
|                          |                           | DQ123070 <sup>41</sup>          |
|                          | <i>P. campanulata</i>     | HQ900953 <sup>40</sup>          |
|                          |                           | DQ123057 <sup>41</sup>          |
|                          | <i>P. candida</i>         | DQ123019 <sup>41</sup>          |
|                          | <i>P. capparidifolia</i>  | HQ900954 <sup>40</sup>          |
|                          | <i>P. capsularis</i>      | HQ900955 <sup>40</sup>          |
|                          |                           | DQ123029 <sup>41</sup>          |
|                          | <i>P. cerasina</i>        | HQ900956 <sup>40</sup>          |
|                          | <i>P. ceratocarpa</i>     | DQ123020 <sup>41</sup>          |
|                          | <i>P. cerradensis</i>     | HQ900957 <sup>40</sup>          |
|                          | <i>P. cf. viridescens</i> | JX470914 <sup>44</sup>          |
|                          | <i>P. chelidonea</i>      | JX470870–JX470871 <sup>44</sup> |
|                          | <i>P. chrysosepala</i>    | JX470872 <sup>44</sup>          |
|                          | <i>P. cincinnata</i>      | DQ123071 <sup>41</sup>          |

Table S3. Cont.

| Plastid Marker           | Species                | GenBank Access                  |                        |
|--------------------------|------------------------|---------------------------------|------------------------|
| <i>trnL</i> (UAA) intron | <i>P. cinnabarina</i>  | AY632731 <sup>42</sup>          |                        |
|                          | <i>P. cirrhiflora</i>  | DQ123101 <sup>41</sup>          |                        |
|                          | <i>P. citrifolia</i>   | AY632732 <sup>42</sup>          |                        |
|                          |                        |                                 | DQ123021 <sup>41</sup> |
|                          | <i>P. clathrata</i>    | DQ123054 <sup>41</sup>          |                        |
|                          | <i>P. cobanensis</i>   | JX470873 <sup>44</sup>          |                        |
|                          | <i>P. coccinea</i>     | HQ900958 <sup>40</sup>          |                        |
|                          | <i>P. contracta</i>    | KF196437–KF196509 <sup>46</sup> |                        |
|                          | <i>P. coriacea</i>     | AF454782 <sup>43</sup>          |                        |
|                          |                        |                                 | DQ123030 <sup>41</sup> |
|                          | <i>P. cubensis</i>     | JX470875 <sup>44</sup>          |                        |
|                          | <i>P. cupiformis</i>   | AY632733 <sup>42</sup>          |                        |
|                          | <i>P. cupraea</i>      | JX470876 <sup>44</sup>          |                        |
|                          |                        |                                 | DQ123102 <sup>41</sup> |
|                          | <i>P. deidamioides</i> | HQ900959 <sup>40</sup>          |                        |
|                          | <i>P. eberhartii</i>   | JX470877 <sup>44</sup>          |                        |
|                          | <i>P. edmundoi</i>     | HQ900960 <sup>40</sup>          |                        |
|                          |                        |                                 | DQ123072 <sup>41</sup> |
|                          | <i>P. edulis</i>       | AF454783 <sup>43</sup>          |                        |
|                          |                        |                                 | HQ900961 <sup>40</sup> |
|                          |                        |                                 | JX470878 <sup>44</sup> |
|                          |                        |                                 | DQ123073 <sup>41</sup> |
|                          | <i>P. eichleriana</i>  | HQ900962 <sup>40</sup>          |                        |
|                          |                        |                                 | DQ123074 <sup>41</sup> |
|                          | <i>P. elegans</i>      | DQ123075 <sup>41</sup>          |                        |
|                          | <i>P. escobariana</i>  | JX470879 <sup>44</sup>          |                        |
|                          | <i>P. exsudans</i>     | JX470880 <sup>44</sup>          |                        |
|                          | <i>P. exura</i>        | DQ123076 <sup>41</sup>          |                        |
|                          | <i>P. filipes</i>      | AY632734 <sup>42</sup>          |                        |
|                          | <i>P. foetida</i>      | HQ900963 <sup>40</sup>          |                        |
|                          |                        |                                 | JQ723387 <sup>47</sup> |
|                          |                        |                                 | DQ123055 <sup>41</sup> |
|                          | <i>P. gabrielliana</i> | DQ123077 <sup>41</sup>          |                        |
|                          | <i>P. galbana</i>      | HQ900964 <sup>40</sup>          |                        |
|                          |                        |                                 | DQ123078 <sup>41</sup> |
|                          | <i>P. garckeii</i>     | DQ123079 <sup>41</sup>          |                        |
| <i>P. gardineri</i>      | HQ900965 <sup>40</sup> |                                 |                        |
| <i>P. gilbertii</i>      | HQ900966 <sup>40</sup> |                                 |                        |
| <i>P. gilbertiana</i>    | JX470881 <sup>44</sup> |                                 |                        |
| <i>P. gracillima</i>     | JX470882 <sup>44</sup> |                                 |                        |
|                          |                        | DQ458091 <sup>48</sup>          |                        |
| <i>P. guatemalensis</i>  | JX470883 <sup>44</sup> |                                 |                        |
| <i>P. haematostigma</i>  | DQ123022 <sup>41</sup> |                                 |                        |
| <i>P. hatschbachii</i>   | HQ900967 <sup>40</sup> |                                 |                        |
| <i>P. helleri</i>        | DQ123031 <sup>41</sup> |                                 |                        |

Table S3. Cont.

| Plastid Marker           | Species               | GenBank Access                 |                        |
|--------------------------|-----------------------|--------------------------------|------------------------|
| <i>trnL</i> (UAA) intron | <i>P. henryi</i>      | AY632735 <sup>42</sup>         |                        |
|                          | <i>P. herbertiana</i> | AY632736 <sup>42</sup>         |                        |
|                          | <i>P. hirtiflora</i>  | JX470885 <sup>44</sup>         |                        |
|                          | <i>P. ichthyura</i>   | JX470886 <sup>44</sup>         |                        |
|                          | <i>P. incarnata</i>   | AY756890 <sup>49</sup>         |                        |
|                          |                       | HQ900968 <sup>40</sup>         |                        |
|                          |                       | DQ123080 <sup>41</sup>         |                        |
|                          |                       | <i>P. indecora</i>             | JX470938 <sup>44</sup> |
|                          |                       | <i>P. iodocarpa</i>            | HQ900969 <sup>40</sup> |
|                          |                       | <i>P. ischnoclada</i>          | HQ900970 <sup>40</sup> |
|                          |                       |                                | DQ123081 <sup>41</sup> |
|                          |                       | <i>P. jilekii</i>              | HQ900971 <sup>40</sup> |
|                          |                       |                                | DQ123082 <sup>41</sup> |
|                          |                       | <i>P. jugorum</i>              | AY632737 <sup>42</sup> |
|                          |                       | <i>P. jussieu</i>              | JX470943 <sup>44</sup> |
|                          |                       | <i>P. karwinskii</i>           | JX470887 <sup>44</sup> |
|                          |                       | <i>P. kawensis</i>             | DQ123023 <sup>41</sup> |
|                          |                       | <i>P. kermesina</i>            | HQ900972 <sup>40</sup> |
|                          |                       |                                | DQ123083 <sup>41</sup> |
|                          |                       | <i>P. lancearia</i>            | JX470888 <sup>44</sup> |
|                          |                       | <i>P. lancetillensis</i>       | DQ123050 <sup>41</sup> |
|                          |                       | <i>P. leptoclada</i>           | HQ900973 <sup>40</sup> |
|                          |                       |                                | JX470889 <sup>44</sup> |
|                          |                       | <i>P. ligularis</i>            | HQ900974 <sup>40</sup> |
|                          |                       | <i>P. lindeniana</i>           | DQ123024 <sup>41</sup> |
|                          |                       | <i>P. lobata</i>               | AF454787 <sup>43</sup> |
|                          |                       | <i>P. lobbii ayacuchoensis</i> | DQ123032 <sup>41</sup> |
|                          |                       | <i>P. lobbii obtusiloba</i>    | DQ123033 <sup>41</sup> |
|                          |                       | <i>P. loefgrenii</i>           | HQ900975 <sup>40</sup> |
|                          |                       | <i>P. luetzerburgii</i>        | DQ123109 <sup>41</sup> |
|                          |                       | <i>P. lutea</i>                | JX470890 <sup>44</sup> |
|                          |                       | <i>P. macrophylla</i>          | DQ123025 <sup>41</sup> |
|                          |                       | <i>P. maestrensis</i>          | JX470891 <sup>44</sup> |
|                          |                       | <i>P. maliformis</i>           | DQ123025 <sup>41</sup> |
|                          |                       | <i>P. manicata</i>             | DQ123062 <sup>41</sup> |
|                          |                       | <i>P. mansoi</i>               | DQ123026 <sup>41</sup> |
|                          |                       | <i>P. mathewsii</i>            | DQ123105 <sup>41</sup> |
|                          |                       | <i>P. membranacea</i>          | AY632726 <sup>42</sup> |
|                          |                       | <i>P. mendoncae</i>            | DQ123110 <sup>41</sup> |
|                          |                       | <i>P. menispermifolia</i>      | AF454785 <sup>43</sup> |
|                          |                       | <i>P. mexicana</i>             | AY632738 <sup>42</sup> |
|                          |                       | <i>P. micropetala</i>          | HQ900976 <sup>40</sup> |
|                          |                       | <i>P. microstipula</i>         | DQ123051 <sup>41</sup> |
|                          |                       | <i>P. miersii</i>              | HQ900977 <sup>40</sup> |
|                          |                       |                                | DQ123085 <sup>41</sup> |



Table S3. Cont.

| Plastid Marker           | Species                | GenBank Access                                                             |
|--------------------------|------------------------|----------------------------------------------------------------------------|
| <i>trnL</i> (UAA) intron | <i>P. misera</i>       | HQ900978 <sup>40</sup><br>JX470892 <sup>44</sup><br>DQ123034 <sup>41</sup> |
|                          | <i>P. mixta</i>        | DQ123106 <sup>41</sup>                                                     |
|                          | <i>P. molissima</i>    | AF454788 <sup>43</sup>                                                     |
|                          | <i>P. moluccana</i>    | AY632739 <sup>42</sup>                                                     |
|                          | <i>P. morifolia</i>    | HQ900979 <sup>40</sup><br>DQ123035 <sup>41</sup>                           |
|                          | <i>P. mucronata</i>    | HQ900980 <sup>40</sup><br>DQ123086 <sup>41</sup>                           |
|                          | <i>P. multiflora</i>   | AY632740 <sup>42</sup><br>DQ123014 <sup>41</sup>                           |
|                          | <i>P. murucuja</i>     | JX470894 <sup>44</sup><br>AY632747 <sup>42</sup><br>DQ123063 <sup>41</sup> |
|                          | <i>P. nitida</i>       | HQ900982 <sup>40</sup><br>DQ123087 <sup>41</sup>                           |
|                          | <i>P. oblongata</i>    | JX470895 <sup>44</sup>                                                     |
|                          | <i>P. obtusifolia</i>  | JX470896 <sup>44</sup>                                                     |
|                          | <i>P. odontophylla</i> | DQ123088 <sup>41</sup>                                                     |
|                          | <i>P. oerstedii</i>    | AF454786 <sup>43</sup>                                                     |
|                          | <i>P. organensis</i>   | HQ900981 <sup>40</sup><br>DQ123036 <sup>41</sup>                           |
|                          | <i>P. ornithoura</i>   | DQ123037 <sup>41</sup>                                                     |
|                          | <i>P. ovalis</i>       | DQ123122 <sup>41</sup><br>KF196419–KF196436 <sup>46</sup>                  |
|                          | <i>P. palmeri</i>      | HQ900983 <sup>40</sup><br>DQ123056 <sup>41</sup>                           |
|                          | <i>P. penduliflora</i> | JX470898 <sup>44</sup><br>DQ123015 <sup>41</sup>                           |
|                          | <i>P. perfoliata</i>   | JX470899 <sup>44</sup>                                                     |
|                          | <i>P. picturata</i>    | HQ900984 <sup>40</sup>                                                     |
|                          | <i>P. pilosicorona</i> | HQ900985 <sup>40</sup>                                                     |
|                          | <i>P. pittieri</i>     | AF454789 <sup>43</sup><br>DQ123027 <sup>41</sup>                           |
|                          | <i>P. platyloba</i>    | AF454790 <sup>43</sup><br>HQ900986 <sup>40</sup>                           |
|                          | <i>P. podlechii</i>    | DQ123013 <sup>41</sup>                                                     |
|                          | <i>P. pohlii</i>       | HQ900987 <sup>40</sup><br>DQ123038 <sup>41</sup>                           |
|                          | <i>P. porphyretica</i> | JX470939 <sup>44</sup>                                                     |
|                          | <i>P. punctata</i>     | DQ123039 <sup>41</sup>                                                     |
|                          | <i>P. pusilla</i>      | JX470900 <sup>44</sup>                                                     |
|                          | <i>P. pyrrhantha</i>   | JX470901 <sup>44</sup>                                                     |

Table S3. Cont.

| Plastid Marker           | Species                   | GenBank Access                  |
|--------------------------|---------------------------|---------------------------------|
| <i>trnL</i> (UAA) intron | <i>P. quadrangularis</i>  | AF454791 <sup>43</sup>          |
|                          |                           | DQ123089 <sup>41</sup>          |
|                          | <i>P. racemosa</i>        | HQ900988 <sup>40</sup>          |
|                          |                           | DQ123028 <sup>41</sup>          |
|                          | <i>P. recurva</i>         | DQ123090 <sup>41</sup>          |
|                          | <i>P. reflexiflora</i>    | DQ123111 <sup>41</sup>          |
|                          | <i>P. rhamnifolia</i>     | DQ123016 <sup>41</sup>          |
|                          | <i>P. riparia</i>         | DQ123091 <sup>41</sup>          |
|                          | <i>P. rovirosae</i>       | DQ123040 <sup>41</sup>          |
|                          | <i>P. rubra</i>           | AY632741 <sup>42</sup>          |
|                          | <i>P. rufa</i>            | JX470902 <sup>44</sup>          |
|                          |                           | DQ123041 <sup>41</sup>          |
|                          | <i>P. rugosissima</i>     | JX470903 <sup>44</sup>          |
|                          | <i>P. sagasteguii</i>     | JX470904 <sup>44</sup>          |
|                          | <i>P. sandrae</i>         | JX470940 <sup>44</sup>          |
|                          | <i>P. sanguinolenta</i>   | JX470905 <sup>44</sup>          |
|                          |                           | DQ123104 <sup>41</sup>          |
|                          | <i>P. serratifolia</i>    | DQ123092 <sup>41</sup>          |
|                          | <i>P. serratodigitata</i> | HQ900989 <sup>40</sup>          |
|                          |                           | DQ123093 <sup>41</sup>          |
|                          | <i>P. setacea</i>         | DQ123094 <sup>41</sup>          |
|                          | <i>P. setulosa</i>        | DQ123058 <sup>41</sup>          |
|                          | <i>P. sexflora</i>        | JX470906 <sup>44</sup>          |
|                          |                           | DQ123042 <sup>41</sup>          |
|                          | <i>P. siamica</i>         | AY632742 <sup>42</sup>          |
|                          | <i>P. sidiifolia</i>      | HQ900990–HQ900991 <sup>40</sup> |
|                          |                           | DQ123095 <sup>41</sup>          |
|                          | <i>P. sodiroi</i>         | JX470907 <sup>44</sup>          |
|                          | <i>P. solomonii</i>       | JX470908 <sup>44</sup>          |
|                          | <i>P. speciosa</i>        | DQ123052 <sup>41</sup>          |
|                          | <i>P. sphaerocarpa</i>    | JX470909 <sup>44</sup>          |
|                          | <i>P. sprucei</i>         | DQ123096 <sup>41</sup>          |
|                          | <i>P. suberosa</i>        | AF454792 <sup>43</sup>          |
|                          |                           | HQ900992 <sup>40</sup>          |
|                          |                           | AY632743 <sup>42</sup>          |
|                          |                           | DQ123043 <sup>41</sup>          |
| <i>P. subrotunda</i>     | HQ900993 <sup>40</sup>    |                                 |
| <i>P. tacanensis</i>     | JX470910 <sup>44</sup>    |                                 |
| <i>P. tacsonioides</i>   | DQ123103 <sup>41</sup>    |                                 |
| <i>P. talamancensis</i>  | AF454793 <sup>43</sup>    |                                 |
|                          | DQ123044 <sup>41</sup>    |                                 |
| <i>P. tatei</i>          | JX470941 <sup>44</sup>    |                                 |
| <i>P. tenuifila</i>      | DQ123097 <sup>41</sup>    |                                 |
| <i>P. tenuiloba</i>      | AY632744 <sup>42</sup>    |                                 |
| <i>P. tetrandra</i>      | AY632746 <sup>42</sup>    |                                 |

Table S3. Cont.

| Plastid Marker           | Species                      | GenBank Access         |                        |
|--------------------------|------------------------------|------------------------|------------------------|
| <i>trnL</i> (UAA) intron | <i>P. tica</i>               | AF461415 <sup>43</sup> |                        |
|                          | <i>P. tina</i>               | JX470911 <sup>44</sup> |                        |
|                          | <i>P. tricuspis</i>          |                        | HQ900994 <sup>40</sup> |
|                          |                              |                        | DQ123045 <sup>41</sup> |
|                          | <i>P. trifasciata</i>        | DQ123046 <sup>41</sup> |                        |
|                          | <i>P. trifoliata</i>         | DQ123108 <sup>41</sup> |                        |
|                          | <i>P. trintae</i>            | DQ123098 <sup>41</sup> |                        |
|                          | <i>P. tripartita</i>         | DQ123107 <sup>41</sup> |                        |
|                          | <i>P. trisecta</i>           | DQ123061 <sup>41</sup> |                        |
|                          | <i>P. truncata</i>           |                        | HQ900995 <sup>40</sup> |
|                          |                              |                        | DQ123047 <sup>41</sup> |
|                          | <i>P. tryphostemmatoides</i> | DQ123113 <sup>41</sup> |                        |
|                          | <i>P. tulae</i>              |                        | HQ900996 <sup>40</sup> |
|                          |                              |                        | JX470912 <sup>44</sup> |
|                          |                              | DQ123064 <sup>41</sup> |                        |
|                          | <i>P. umbilicata</i>         | DQ123112 <sup>41</sup> |                        |
|                          | <i>P. urnifolia</i>          | JX470942 <sup>44</sup> |                        |
|                          | <i>P. urubiciensis</i>       |                        | HQ900997 <sup>40</sup> |
|                          |                              |                        | DQ123099 <sup>41</sup> |
|                          | <i>P. vespertilio</i>        |                        | HQ900998 <sup>40</sup> |
|                          |                              |                        | JX470913 <sup>44</sup> |
|                          |                              | DQ123048 <sup>41</sup> |                        |
|                          | <i>P. villosa</i>            | DQ123059 <sup>41</sup> |                        |
|                          | <i>P. vitifolia</i>          |                        | AF454794 <sup>43</sup> |
|                          |                              |                        | HQ900999 <sup>40</sup> |
|                          |                              | JX470915 <sup>44</sup> |                        |
|                          |                              | DQ123053 <sup>41</sup> |                        |
| <i>P. watsoniana</i>     |                              | HQ901000 <sup>40</sup> |                        |
|                          |                              | DQ123100 <sup>41</sup> |                        |
| <i>P. xiikzodz</i>       |                              | JX470916 <sup>44</sup> |                        |
|                          |                              | DQ123049 <sup>41</sup> |                        |

1: Yockteng R, Nadot S (2004) Infrageneric phylogenies: a comparison of chloroplast-expressed glutamine synthetase, cytosol-expressed glutamine synthetase and cpDNA maturase K in *Passiflora*. Molecular Phylogenetics and Evolution, 31, 397-402; 2: International Barcode of Life (iBOL). Unpublished; 3: Tokuoka T. Molecular phylogenetic analysis of Passifloraceae *sensu lato* (Malpighiales) based on plastid and nuclear DNA sequences. Unpublished; 4: Jansen RK, Cai Z, Raubeson LA, *et al.* (2007) Analysis of 81 genes from 64 plastid genomes resolves relationships in angiosperms and identifies genome-scale evolutionary patterns. Proceedings of the National Academy of Sciences of United States of America. 104, 19369-19374; 5: Abbott JR, Neubig KM, Whitten WM, Williams NH. DNA barcoding the flora of Florida: Invasive species. Unpublished; 6: Schaefer H, Hardy OJ, Silva L, Barraclough TG, Savolainen V (2011). Testing Darwin's naturalization hypothesis in the Azores. Ecol. Lett. 14, 389-396; 7: Roeder M, Slik JWF. Phylogenetic structure of liana communities along a disturbance gradient in South West China. Unpublished; 8: Xi Z, Ruhfel BR, Schaefer H, *et al.* (2012) Phylogenomics and a posteriori data partitioning resolve the Cretaceous angiosperm radiation Malpighiales. Proc. Natl. Acad. Sci. U.S.A. 109, 17519-17524; 9: Davis CC, LatvisM, Nickrent DL, Wurdack KJ, Baum DA (2007) Floral gigantism in Rafflesiaceae.

Science 315 (5820), 1812; 10: Palhares RM. Barcode identification of medicinal plants and comparison with chemical identification. Unpublished; 11: Tokoua T, Tobe H (2006) Phylogenetic analyses of Malpighiales using plastid and nuclear DNA sequences, with particular reference to the embryology of Euphorbiaceae sens. Str. J. Plant Res. 119, 599-616; 12: Worberg A, Alford MH, Quandt D, Borsch T (2009) Huerteales sister to Brassicales plus Malvales, and newly circumscribed to include Dipentodon, Gerrardina, Huerteia, Perrottetia, and Tapiscia. Taxon 58, 468-478; 13: Qiu YL, Li L, Hendry TA *et al.* Reconstructing the Basal Angiosperm Phylogeny: Evaluating Information Content of the Mitochondrial Genes. Unpublished; 14: Hilu KW, Black C, Diouf D, Burleigh JG (2008) Phylogenetic signal in matK vs. trnK: a case study in early diverging eudicots (angiosperms). Mol. Phylogenet. Evol. 48, 1120-1130; 15: Muschner VC, Lorenz-Lemke AP, Cervi AC, Bonatto S, Freitas LB. Phylogenetic relationships among *Passiflora* (Passifloraceae) species: a new taxonomic proposal. Unpublished; 16: Yotoko KS, Dornelas MC, Togni PD, *et al.* (2011) Does variation in genome sizes reflect adaptive or neutral processes? New clues from *Passiflora*. PLoS ONE 6: E18212; 17: International Barcode of Life (iBOL). Unpublished; 18: Tokoua T. Molecular phylogenetic analysis of Passifloraceae *sensu lato* (Malpighiales) based on plastid and nuclear DNA sequences. Unpublished; 19: Jansen RK, Cai Z, Raubeson LA, *et al.* (2007) Analysis of 81 genes from 64 plastid genomes resolves relationships in angiosperms and identifies genome-scale evolutionary patterns. Proceedings of the National Academy of Sciences of United States of America. 104, 19369-19374; 20: Abbott JR, Neubig KM, Whitten WM, Williams NH. DNA barcoding the flora of Florida: Invasive species. Unpublished; 21: Schaefer H, Hardy OJ, Silva L, Barraclough TG, Savolainen V (2011). Testing Darwin's naturalization hypothesis in the Azores. Ecol. Lett. 14, 389-396; 22: Xi Z, Ruhfel BR, Schaefer H, *et al.* (2012) Phylogenomics and a posteriori data partitioning resolve the Cretaceous angiosperm radiation Malpighiales. Proc. Natl. Acad. Sci. U.S.A. 109, 17519-17524; 23: Chen S, Yao H, Han J, *et al.* (2010) Validation of the ITS2 region as a novel DNA barcode for identifying medicinal plant species. PLoS ONE 5, E8613; 24: Laiou A, Mandolini LA, Piredda R, Bellarosa R, Simeone MC (2013) DNA barcoding as a complementary tool for conservation and valorisation of forest resources. Zookeys 365, 197-213; 25: Saritha KV, Khedar GD, Hanumanth Kumar G, Tiknaik AD, Ughade BR. Direct submission; 26: Kress J, Erickson DL (2007) A two-locus global DNA barcode for land plants: the coding rbcL gene complements the non-coding trnH-psbA spacer region. PLoS ONE 2, E508; 27: CBOL Plant Working Group. A DNA Barcode for Land Plants. Unpublished; 28: Cornara L, Borghesi B, Canali C, *et al.* (2013) Smart drugs: green shuttle or real drug? Int. J. Legal Med. 127, 1109-1123; 29: Kress WJ, Wurdack KJ, Zimmer EA, Weigt LA, Janzen DH (2005). Use of DNA barcodes to identify flowering plants. Proc. Natl. Acad. Sci. U.S.A. 102, 8369-8374; 30: Tokoua T, Tobe H (2006) Phylogenetic analyses of Malpighiales using plastid and nuclear DNA sequences, with particular reference to the embryology of Euphorbiaceae sens. Str. J. Plant Res. 119, 599-616; 31: Albert VA, Williams SE, Chase MW (1992) Carnivorous plants: phylogeny and structural evolution. Science 257 (5076), 1491-1495 (1992); 32: Muschner VC, Lorenz AP, Scherer NM, *et al.* Comparative Phylogenetic Analysis of Nuclear and Plastid Sequences in *Passiflora* (Passifloraceae). Unpublished; 33: Lorenz-Lemke AP, Muschner VC, Bonatto SL, Cervi AC, Salzano FM, Freitas LB (2006) Phylogeographic inferences concerning evolution of Brazilian *Passiflora actinia* and *P. elegans* (Passifloraceae) based on ITS (nrDNA) variation. Ann. Bot. 95: 799-806; 34: Abbott JR, Neubig KM, Whitten WM, Williams NH. DNA barcoding the flora of Florida: Invasive species. Unpublished; 35: Lorenz AP, Muschner VC, Bonatto SL, Salzano FM, Freitas LB. Molecular evidence for the origin of *Passiflora elegans* (Passifloraceae) from southern Brazil Unpublished; 36: Muschner VC, Lorenz-Lemke AP, Vecchia M, Bonatto SL, Salzano FM, Freitas LB (2006) Differential organellar inheritance in *Passiflora* (Passifloraceae) subgenera. Genetica 128, 449-453; 37: Kress J, Erickson DL (2007) A two-locus global DNA barcode for land plants: the coding rbcL gene complements the non-coding trnH-psbA spacer region. PLoS ONE 2, E508; 38: CBOL Plant Working Group. A DNA Barcode for Land Plants. Unpublished; 39: Kress WJ, Wurdack KJ, Zimmer EA, Weigt LA, Janzen DH (2005). Use of DNA barcodes to identify

flowering plants. Proc. Natl. Acad. Sci. U.S.A. 102, 8369-8374; 40: Yotoko KS, Dornelas MC, Togni PD, *et al.* (2011) Does variation in genome sizes reflect adaptive or neutral processes? New clues from *Passiflora*. PLoS ONE 6: E18212; 41: Muschner VC, Lorenz-Lemke AP, Cervi AC, Bonatto S, Freitas LB. Phylogenetic relationships among *Passiflora* (Passifloraceae) species: a new taxonomic proposal. Unpublished; 42: Krosnick SE, Freudenstein JV (2005) Monophyly and floral character homology of old world *Passiflora* (Subgenus *Decaloba*: Supersection *Disemma*). Systematic Botany, 30, 139-152; 43: Ossowski AM, Hunter FF. Coevolution of *Heliconius* spp. and *Passiflora* spp.: A phylogenetic comparison. Unpublished; 44: Krosnick SE, Porter-Utley KE, MacDougal JM, Jørgensen PM, McDade LA (2013) New insights into the evolution of *Passiflora* subgenus *Decaloba* (Passifloraceae): phylogenetic relationships and morphological synapomorphies. Systematic Botany, 38, 692-713; 45: Krosnick SE, Freudenstein JV (2006) Patterns of anomalous floral development in the Asian *Passiflora* (subgenus *Decaloba*: supersection *Disemma*). Am. J. Bot., 93, 620-636; 46: Cazé ALR, Mäder G, Bonatto SL, Freitas LB (2013) A molecular systematic analysis of *Passiflora ovalis* and *Passiflora contracta* (Passifloraceae). Phytotaxa, 132, 39-46; 47: Thulin M, Razafimandimbison SG, Chafe P, Heidari N, Kool A, Shore JS (2012) Phyloheny of the Turneracea clade (Passifloraceae): Trans-Atlantic disjunctions and two new genera in Africa. Taxon, 61, 308-323; 48: Krosnick SE, Ford A, Freudenstein JV. Resolving the phylogenetic position of *Hollrungia* and *Tetrapathaea*: The end of two monotypic genera in Passifloraceae. Unpublished; 49: Alford, MH. Phylogeny, character evolution, and classification of the Flacourtiaceae/Salicaceae complex. Unpublished.

**Table S4.** Primer sequences and references for studied ITS sequences.

| Article Reference                                                                                                                                                                                                                                                                                        | Primers Used for ITS Sequences                                                    | Primer Reference                    |
|----------------------------------------------------------------------------------------------------------------------------------------------------------------------------------------------------------------------------------------------------------------------------------------------------------|-----------------------------------------------------------------------------------|-------------------------------------|
| Cazé, A.L.R.; Mäder, G.; Bonatto, S.L.; Freitas, L.B. A molecular systematic analysis of <i>Passiflora ovalis</i> and <i>Passiflora contracta</i> (Passifloraceae). <i>Phytotaxa</i> <b>2013</b> , <i>132</i> , 39–46.                                                                                   | 5' AAGGTTTCCGTAGGTGAAC 3'<br>and 5' TATGCTTAAACTCAGCGGG 3'                        | Desfeux & Lejeune (1996)            |
| Giudicelli <i>et al.</i> (in prep)                                                                                                                                                                                                                                                                       | 5' AAGGTTTCCGTAGGTGAAC 3'<br>and 5' TATGCTTAAACTCAGCGGG 3'                        | Desfeux & Lejeune (1996)            |
| Hearn, D.J. <i>Adenia</i> (Passifloraceae) and its adaptative radiation: Phylogeny and growth form diversification. <i>Syst. Bot.</i> <b>2006</b> , <i>31</i> , 805–821.                                                                                                                                 | N18S (5' AGGAGAAGTCGTAACAGG 3')<br>and C26A (5' GTTTCTTTCCTCCGCT 3')              | Modified from Wen and Zimmer (1996) |
| Kay, E.E. Floral Evolutionary Ecology of Passiflora: subgenera <i>Murucuia</i> , <i>Pseudomurucuia</i> and <i>Astephia</i> . Unpublished.                                                                                                                                                                | GenBank information: unpublished                                                  |                                     |
| Koehler-Santos, P.; Lorenz-Lemke, A.P.; Muschner, V.C.; Bonatto, S.L.; Salzano, F.M.; Freitas, L.B. Molecular genetic variation in <i>Passiflora alata</i> (Passifloraceae), na invasive species in southern Brazil. <i>Biological Journal of the Linnean Society</i> <b>2006</b> , <i>88</i> , 611–630. | 5' AAGGTTTCCGTAGGTGAAC 3'<br>and 5' TATGCTTAAACTCAGCGGG 3'                        | Desfeux & Lejeune (1996)            |
| Kress, W.J.; Wurdack, K.J.; Zimmer, E.A.; Weigt, L.A.; Janzen, D.H. Use of DNA barcodes to identify flowering plants. <i>Proc. Natl. Acad. Sci. USA</i> <b>2005</b> , <i>102</i> , 8369–8374.                                                                                                            | Primers 5<br>(5' GGAAGTAAAAGTCGTAACAAGG 3')<br>and 4 (5' TCCTCCGCTTATTGATATGC 3') | White <i>et al.</i> (1990)          |
| Krosnick SE, Ford A, Freudenstein JV. Resolving the phylogenetic position of <i>Hollrungia</i> and <i>Tetrapathaea</i> : The end of two monotypic genera in Passifloraceae. Unpublished.                                                                                                                 | GenBank information: unpublished                                                  |                                     |
| Krosnick, S.E.; Freudenstein, J.V. Monophyly and floral character homology of old world <i>Passiflora</i> (Subgenus <i>Decaloba</i> : Supersection <i>Disemma</i> ). <i>Syst. Bot.</i> <b>2005</b> , <i>30</i> , 139–152.                                                                                | Primers 5<br>(5' GGAAGTAAAAGTCGTAACAAGG 3')<br>and 4 (5' TCCTCCGCTTATTGATATGC 3') | White <i>et al.</i> (1990)          |

Table S4. *Cont.*

| Article Reference                                                                                                                                                                                                                                                                                              | Primers Used for ITS Sequences                                                    | Primer Reference           |
|----------------------------------------------------------------------------------------------------------------------------------------------------------------------------------------------------------------------------------------------------------------------------------------------------------------|-----------------------------------------------------------------------------------|----------------------------|
| Krosnick, S.E.; Freudenstein, J.V. Patterns of anomalous floral development in the Asian <i>Passiflora</i> (Subgenus <i>Decaloba</i> : Supersection <i>Disemma</i> ). <i>Am. J. Bot.</i> <b>2006</b> , <i>93</i> , 620–636.                                                                                    | Primers 5<br>(5' GGAAGTAAAAGTCGTAACAAGG 3')<br>and 4 (5' TCCTCCGCTTATTGATATGC 3') | White <i>et al.</i> (1990) |
| Krosnick, S.E.; Freudenstein, J.V. Phylogenetic relationships among the Old World species of <i>Passiflora</i> L. (Subgenus <i>Decaloba</i> : Supersection <i>Disemma</i> ). Unpublished.                                                                                                                      | GenBank information: unpublished                                                  |                            |
| Krosnick, S.E.; Porter-Utley, K.E.; MacDougal, J.M.; Jørgensen, P.M.; McDade, L.A. New insights into the evolution of <i>Passiflora</i> subgenus <i>Decaloba</i> (Passifloraceae): Phylogenetic relationships and morphological synapomorphies. <i>Syst. Bot.</i> <b>2013</b> , <i>38</i> , 692–713.           | Primers 5<br>(5' GGAAGTAAAAGTCGTAACAAGG 3')<br>and 4 (5' TCCTCCGCTTATTGATATGC 3') | White <i>et al.</i> (1990) |
| Krosnick, S.E.; Xun-Lin, Y.; Deng, Y. The rediscovery of <i>Passiflora kwangtungensis</i> Merr. (subgenus <i>Decaloba</i> supersection <i>Disemma</i> ): A critically endangered Chinese endemic. <i>PhytoKeys</i> <b>2013</b> , <i>23</i> , 55–74.                                                            | Primers 5<br>(5' GGAAGTAAAAGTCGTAACAAGG 3')<br>and 4 (5' TCCTCCGCTTATTGATATGC 3') | White <i>et al.</i> (1990) |
| Lorenz-Lemke, A.P.; Muschner, V.C.; Bonatto, S.L.; Cervi, A.C.; Salzano, F.M.; Freitas, L.B. Phylogeographic inferences concerning evolution of Brazilian <i>Passiflora actinia</i> and <i>P. elegans</i> (Passifloraceae) based on ITS (nrDNA) variation. <i>Ann. Bot.</i> <b>2005</b> , <i>95</i> , 799–806. | 5' AAGGTTTCCGTAGGTGAAC 3'<br>and 5' TATGCTTAAACTCAGCGGG 3'                        | Desfeux & Lejeune (1996)   |
| Mäder, G.; Zamberlan, P.M.; Fagundes, N.J.R.; Magnus, T.; Salzano, F.M.; Bonatto, S.L.; Freitas, L.B. The use and limits of ITS data in the analysis of intraspecific variation in <i>Passiflora</i> L. (Passifloraceae). <i>Genet. Mol. Biol.</i> <b>2010</b> , <i>33</i> , 99–108.                           | 5' AAGGTTTCCGTAGGTGAAC 3'<br>and 5' TATGCTTAAACTCAGCGGG 3'                        | Desfeux & Lejeune (1996)   |
| Muschner, V.C.; Lorenz, A.P.; Cervi, A.C.; Bonatto, S.L.; Souza-Chies, T.T.; Salzano, F.M.; Freitas, L.B. A first molecular phylogenetic analysis of <i>Passiflora</i> (Passifloraceae). <i>Am. J. Bot.</i> <b>2003</b> , <i>90</i> , 1229–1238.                                                               | 5' AAGGTTTCCGTAGGTGAAC 3'<br>and 5' TATGCTTAAACTCAGCGGG 3'                        | Desfeux & Lejeune (1996)   |

Table S4. *Cont.*

| Article Reference                                                                                                                                                                                                                              | Primers Used for ITS Sequences                                                             | Primer Reference                   |
|------------------------------------------------------------------------------------------------------------------------------------------------------------------------------------------------------------------------------------------------|--------------------------------------------------------------------------------------------|------------------------------------|
| Muschner, V.C.; Lorenz-Lemke, A.P.; Vecchia, M.; Bonatto, S.L.; Salzano, F.M.; Freitas, L.B. Differential organellar inheritance in <i>Passiflora</i> (Passifloraceae) subgenera. <i>Genetica</i> <b>2006</b> , <i>128</i> , 449–453.          | 5' AAGGTTTCCGTAGGTGAAC 3' and<br>5' TATGCTTAAACTCAGCGGG 3'                                 | Desfeux & Lejeune (1996)           |
| Ossowski, A.M.; Hunter, F.F. Coevolution of <i>Heliconius</i> spp. and <i>Passiflora</i> spp.: A phylogenetic comparison. Unpublished.                                                                                                         | GenBank information: unpublished                                                           |                                    |
| Thulin M, Razafimandimbison, S.G.; Chafe, P.; Heidari, N.; Kool, A.; Shore, J.S. Phyloheny of the Turneracea clade (Passifloraceae): Trans-Atlantic disjunctions and two new genera in Africa. <i>Taxon</i> <b>2012</b> , <i>61</i> , 308–323. | P17F<br>(5' CTACCGATTGAATGGTCCGGTGAA 3')<br>and 26S–82R<br>(5' TCCCGTTTCGCTCGCCGTTACTA 3') | Alejandro <i>et al.</i> (2005)     |
| Wright, S.; Keeling, J.; Gillman, L. The road from santa Rosalia: A faster tempo of evolution on tropical climes. <i>Proc. Natl. Acad. Sci. USA</i> <b>2006</b> , <i>103</i> , 7718–7722.                                                      | CY1<br>(5' TACCGATTGAATGATCCGGTGAAG 3')<br>and CY3<br>(5' CGCCGTTACTAGGGGAATCCTTGT 3')     | C. G. Yong, personal communication |
